# Supplementary material for: Stigma, displacement stressors and psychiatric morbidity among displaced Syrian men who have sex with men (MSM) and transgender women: a cross-sectional study in Lebanon
Source: PubMed Central journal article supplement — BMJ Open. 2021 May 13;11(5):e046996. doi: 10.1136/bmjopen-2020-046996 (PMC8126317; doi:10.1136/bmjopen-2020-046996), 2021-05-13
Supplement: bmjopen-2020-046996.draft_revisions.pdf [file bmjopen-2020-046996.draft_revisions.pdf]

# BMJ Open

BMJ Open is committed to open peer review. As part of this commitment we make the peer review history of every article we publish publicly available.

When an article is published we post the peer reviewers' comments and the authors' responses online. We also post the versions of the paper that were used during peer review. These are the versions that the peer review comments apply to.

The versions of the paper that follow are the versions that were submitted during the peer review process. They are not the versions of record or the final published versions. They should not be cited or distributed as the published version of this manuscript.

BMJ Open is an open access journal and the full, final, typeset and author-corrected version of record of the manuscript is available on our site with no access controls, subscription charges or pay-per-view fees (<http://bmjopen.bmj.com>).

If you have any questions on BMJ Open's open peer review process please email [info.bmjopen@bmj.com](mailto:info.bmjopen@bmj.com)

# BMJ Open

## Stigma, displacement stressors, and psychiatric morbidity among displaced Syrian men who have sex with men and transgender women in Lebanon, 2019

|                               |                                                                                                                                                                                                                                                                                                                                                                                                                                                                                                                                                                                                                                                                                   |
|-------------------------------|-----------------------------------------------------------------------------------------------------------------------------------------------------------------------------------------------------------------------------------------------------------------------------------------------------------------------------------------------------------------------------------------------------------------------------------------------------------------------------------------------------------------------------------------------------------------------------------------------------------------------------------------------------------------------------------|
| Journal:                      | <i>BMJ Open</i>                                                                                                                                                                                                                                                                                                                                                                                                                                                                                                                                                                                                                                                                   |
| Manuscript ID                 | bmjopen-2020-046996                                                                                                                                                                                                                                                                                                                                                                                                                                                                                                                                                                                                                                                               |
| Article Type:                 | Original research                                                                                                                                                                                                                                                                                                                                                                                                                                                                                                                                                                                                                                                                 |
| Date Submitted by the Author: | 16-Nov-2020                                                                                                                                                                                                                                                                                                                                                                                                                                                                                                                                                                                                                                                                       |
| Complete List of Authors:     | Clark, Kirsty; Yale University School of Public Health, Pachankis, John ; Yale School of Public Health Khoshnood, Kaveh; Yale University School of Public Health Branstrom, R.; Yale University Yale School of Public Health, Department of Chronic Disease Epidemiology; Karolinska Institutet Department of Clinical Neuroscience, Department of clinical neuroscience Seal, David; Tulane University School of Public Health and Tropical Medicine, Global Community Health and Behavioral Sciences Khoury, Danielle; American University of Beirut Fouad, F Barbour, Russell; Yale University School of Public Health Heimer, Robert; Yale University School of Public Health |
| Keywords:                     | MENTAL HEALTH, PUBLIC HEALTH, EPIDEMIOLOGY                                                                                                                                                                                                                                                                                                                                                                                                                                                                                                                                                                                                                                        |
|                               |                                                                                                                                                                                                                                                                                                                                                                                                                                                                                                                                                                                                                                                                                   |

SCHOLARONE™  
Manuscripts

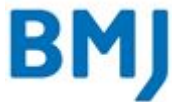

I, the Submitting Author has the right to grant and does grant on behalf of all authors of the Work (as defined in the below author licence), an exclusive licence and/or a non-exclusive licence for contributions from authors who are: i) UK Crown employees; ii) where BMJ has agreed a CC-BY licence shall apply, and/or iii) in accordance with the terms applicable for US Federal Government officers or employees acting as part of their official duties; on a worldwide, perpetual, irrevocable, royalty-free basis to BMJ Publishing Group Ltd ("BMJ") its licensees and where the relevant Journal is co-owned by BMJ to the co-owners of the Journal, to publish the Work in this journal and any other BMJ products and to exploit all rights, as set out in our [licence](#).

The Submitting Author accepts and understands that any supply made under these terms is made by BMJ to the Submitting Author unless you are acting as an employee on behalf of your employer or a postgraduate student of an affiliated institution which is paying any applicable article publishing charge ("APC") for Open Access articles. Where the Submitting Author wishes to make the Work available on an Open Access basis (and intends to pay the relevant APC), the terms of reuse of such Open Access shall be governed by a Creative Commons licence – details of these licences and which [Creative Commons](#) licence will apply to this Work are set out in our licence referred to above.

Other than as permitted in any relevant BMJ Author's Self Archiving Policies, I confirm this Work has not been accepted for publication elsewhere, is not being considered for publication elsewhere and does not duplicate material already published. I confirm all authors consent to publication of this Work and authorise the granting of this licence.

1  
2  
3  
4  
5  
6  
7  
8  
9 Stigma, displacement stressors, and psychiatric morbidity among displaced Syrian men who  
10  
11 have sex with men and transgender women in Lebanon, 2019  
12  
13  
14  
15  
16

17 Kirsty A. Clark, PhD<sup>1</sup>, John E. Pachankis, PhD<sup>1</sup>, Kaveh Khoshnood, PhD<sup>1</sup>, Richard Bränström,  
18  
19 PhD<sup>2</sup>, David W. Seal, PhD<sup>3</sup>, Danielle Khoury, MPH<sup>4</sup>, Fouad M. Fouad, MD<sup>4</sup>, Russell Barbour,  
20  
21 PhD<sup>1</sup>, Robert Heimer, PhD<sup>1</sup>  
22  
23  
24  
25  
26  
27  
28  
29  
30

31 <sup>1</sup>Yale School of Public Health, 60 College St, New Haven, CT, 06510, USA

32 <sup>2</sup>Karolinska Institutet, Solnavägen 1, 171 77 Solna, Sweden

33  
34 <sup>3</sup>Tulane University School of Public Health & Tropical Medicine, 1440 Canal St, New Orleans,  
35  
36 LA, 70112, USA

37 <sup>4</sup>American University of Beirut, Bliss Street, Beirut, Lebanon  
38  
39  
40  
41  
42

43 Corresponding Author:  
44 Kirsty Clark, PhD, MPH  
45 Department of Social and Behavioral Sciences  
46 Yale School of Public Health  
47 60 College St. New Haven, CT, 06510  
48 Email: [kirsty.clark@yale.edu](mailto:kirsty.clark@yale.edu)  
49 Phone: 646-344-4060  
50

51  
52 **Word Count:** 2999  
53  
54  
55  
56  
57  
58  
59  
60

## ABSTRACT

**Background.** Displaced Syrians face psychiatric morbidity often resultant from displacement-related stressors (e.g., resource scarcity). Both men who have sex with men (MSM) and transgender women among the displaced Syrians are particularly vulnerable to mental health challenges given that they also often face stigma-related stressors (e.g., discrimination).

**Methods.** Between January and December 2019 in greater Beirut, 258 Lebanese-born and 230 displaced Syrian MSM and transgender women were recruited via respondent-driven sampling to complete an in-person survey assessing displacement-related stressors, stigma-related stressors, and depression, anxiety, and posttraumatic stress disorder. In the total sample, we first documented the prevalence of psychiatric morbidity; among the displaced Syrians, we then assessed associations among displacement-related and stigma-related stressors and each psychiatric outcome.

**Results.** Sixty-three percent of Syrian participants met criteria for depression compared to 43.8% of Lebanese participants ( $p < 0.001$ ); 21.3% of Syrians met criteria for severe anxiety compared to 13.1% of Lebanese participants ( $p < 0.05$ ); and 33.0% of Syrians met criteria for posttraumatic stress disorder compared to 18.4% of Lebanese participants ( $p < 0.001$ ). Among Syrian MSM and transgender women, socio-demographic characteristics, displacement-related stressors, and stigma-related stressors were uniquely associated with psychiatric morbidity.

**Conclusion.** Displaced Syrian MSM and transgender women experience higher levels of psychiatric co-morbidities than Lebanese MSM and transgender women in part due to compounding exposure to displacement-related stressors and stigma-related stressors. Informed by tenets of minority stress theory and intersectionality theory, we discuss mental health intervention implications and future directions.

### Strengths and limitations of this study

- This is the first study assessing psychiatric morbidity among Syrian men who have sex with men (MSM) and transgender women displaced by armed conflict in Lebanon.
- Respondent-driven sampling recruited both Lebanese and displaced Syrians, allowing for comparison of prevalence and determinants of psychiatric morbidity between groups.
- Valid and reliable instruments were used to assess stigma, displacement stressors, and psychiatric morbidity.
- The study's cross-sectional design precludes causal inference of determinants of psychiatric morbidity.
- This study assessed discrimination and assault events related to sexual minority status; it did not assess discrimination and assaults events related to gender identity or Syrian nationality.

peer review only

## INTRODUCTION

Since March 2011, over half of Syria's population has been displaced to escape the ongoing armed conflict, with many taking refuge in neighboring Lebanon. The United Nations High Commissioner for Refugees (UNHCR) has deemed the Syrian refugee crisis the largest humanitarian emergency in modern history. One and half million fled to Lebanon, which prior to the influx of Syrian refugees had a population of no greater than 4.5 million and which now hosts the largest proportion of refugees per capita in the world[1].

Displaced Syrians living in Lebanon face significant psychosocial challenges associated with depression, anxiety, and posttraumatic stress disorder. Recently, two studies documented that the prevalence of depression and posttraumatic stress disorder among samples of displaced Syrians in Lebanon exceeded 27% and 43%, respectively[2-3]. Psychiatric morbidity emerges from a confluence of risk factors including pre-existing mental disorders; conflict-related trauma, violence, loss, and displacement; and maladjustment to a new environment due to poor living conditions, scarcity of resources, and intergroup conflict with host communities[4-5].

Both men who have sex with men (MSM) and transgender women among the displaced Syrians are particularly vulnerable to the mental health challenges of stigma given their dual minority status both as a MSM or transgender woman and displaced person[6]. In addition to fleeing their homes to escape war and political instability, Syrian MSM and transgender women also flee to escape identity-related persecution and violence[7]. Once in Lebanon, however, they often face anti-gay and anti-transgender stigma driven by a conservative legal climate and social attitudes. MSM and transgender women in Lebanon report negative psychosocial outcomes (e.g., concealment, shame) in response to anti-gay and anti-transgender discrimination and

1  
2  
3 harassment[8-9]. One recent study found that Syrian MSM in Lebanon experienced more than  
4  
5 twice the prevalence of discriminatory or violent events than Lebanese MSM, perhaps owing to  
6  
7 the intersection of their MSM status and Syrian nationality[6].  
8  
9

10  
11 Minority stress theory posits that discrimination based on sexual or gender identity can lead to  
12  
13 internalized stigmatizing beliefs and associated psychological distress[10]. Due in large part to  
14  
15 these experiences, sexual and gender minorities around the world experience elevated rates of  
16  
17 psychiatric morbidity compared to their heterosexual, cisgender peers[11-12]. Yet to our  
18  
19 knowledge, only two studies have assessed the prevalence of depression among Lebanese MSM  
20  
21 (26%)[13] and transgender women (66%)[9] and neither examined the prevalence or  
22  
23 determinants of mental health problems among displaced Syrian MSM and transgender women.  
24  
25 The lack of studies including displaced Syrian MSM and transgender women hampers  
26  
27 understanding of the relative importance of displacement-related determinants (e.g.,  
28  
29 displacement stressors, resource scarcity, displacement-related discrimination) versus MSM and  
30  
31 transgender-related determinants (e.g., experienced and internalized stigma) on psychiatric  
32  
33 morbidity in this population. Assessing such determinants can inform tailored mental health  
34  
35 interventions deemed critical by UNHCR and other humanitarian organizations for reducing  
36  
37 psychiatric morbidity and associated distress among this vulnerable subgroup of Syrians[6].  
38  
39  
40  
41  
42

43  
44 Drawing on a large sample of MSM and transgender women recruited by respondent-driven  
45  
46 sampling in Lebanon, the current study sought to: (1) assess and compare the prevalence of  
47  
48 common psychiatric disorders (i.e., depression, anxiety, posttraumatic stress disorder) among  
49  
50 Lebanese and Syrian MSM and transgender women, and (2) among Syrian MSM and  
51  
52 transgender women, examine the relative impact of displacement-specific and MSM and  
53  
54



1  
2  
3 transgender-specific determinants of psychiatric morbidity. This study represents the first  
4  
5 investigation of prevalence and determinants of psychiatric morbidity among displaced Syrian  
6  
7 MSM and transgender women.  
8  
9

## 10 **METHOD**

### 11 **Participants**

12  
13  
14  
15  
16 Between January and December 2019, MSM and transgender women in the greater Beirut region  
17  
18 were recruited to complete a biobehavioral survey of socio-demographics, mental health, stigma  
19  
20 experiences, and sexually transmitted infections (STI) focusing on HIV-risk and protective  
21  
22 behaviors[6]. The current manuscript does not report STI-related results. Eligible participants  
23  
24 had been assigned male sex at birth, reported oral or anal sexual intercourse with a male in the  
25  
26 past six months, and provided informed consent. Participants were recruited utilizing respondent-  
27  
28 driven sampling[14] by one of five local non-governmental organizations (NGOs) serving  
29  
30 lesbian, gay, bisexual, transgender, and queer (LGBTQ) populations. Briefly, nine Syrian-born  
31  
32 seed participants were recruited directly by study personnel. Each then received four coupons to  
33  
34 recruit additional participants and successful recruits were then each given four coupons.  
35  
36 Participants received \$20 for completing the survey and \$10 for each subsequently recruited  
37  
38 participant. Surveys were conducted in Arabic via in-person interviews with trained study staff at  
39  
40 local NGOs or LGBTQ-friendly venues (e.g., bars).  
41  
42  
43  
44  
45

46  
47 MSM and transgender women were included in the current study if they completed any mental  
48  
49 health assessment (i.e., depression, anxiety, and posttraumatic stress) and were either Lebanese-  
50  
51 born or were Syrian-born and migrated to Lebanon after March 15, 2011 when the Syrian  
52  
53 conflict began. For this reason, we can consider all Syrian participants in the current study to be  
54  
55  
56

1  
2  
3 displaced Syrians. In total, 594 MSM and transgender women were recruited. We dropped from  
4 analyses 19 Syrian-born individuals who migrated to Lebanon before March 15, 2011, 27  
5  
6 participants who were born outside of Lebanon or Syria (e.g., Iraq, Jordan, Kuwait), and 60  
7  
8 participants who did not complete any mental health assessments. Our final analytic sample size  
9  
10 was 488. This study was approved by the Yale Human Subjects Committee and the Institutional  
11  
12 Review Board at the American University of Beirut.  
13  
14  
15

### 16 17 **Patient and public involvement statement**

18  
19 Neither patients nor the public was included in the design, conduct, reporting or dissemination  
20  
21 plans of the research. However, local LGBTQ NGOs serving MSM and transgender women in  
22  
23 greater Beirut were involved in study design and participant recruitment.  
24  
25  
26

### 27 28 **Measures**

29  
30  
31 *Socio-demographics.* We assessed age, household size, gender identity, education level, monthly  
32  
33 income, relationship status, and partner gender.  
34  
35

36  
37 *Discrimination and assault.* Stigma-related measures assessed experiences related to sexual  
38  
39 minority status; experiences specific to gender minority status were not assessed in this study.  
40  
41 Discrimination was measured by five yes-or-no questions assessing whether an individual had  
42  
43 been refused health care, employment, religious services, restaurant or bar service, or housing in  
44  
45 the past 12 months because they were believed to be a sexual minority. Assault was measured by  
46  
47 three yes-or-no questions assessing if an individual had experienced verbal harassment, physical  
48  
49 abuse, or sexual assault in the past 12 months because they were believed to be a sexual  
50  
51 minority. These questions have been reliably used to measure discrimination and assault  
52  
53 exposure among MSM around the world including in Lebanon[6].  
54  
55  
56  
57  
58  
59  
60

1  
2  
3 *Internalized stigma.* Two sets of six items measured internalized stigmatizing beliefs regarding  
4 one's status as a sexual minority or, if applicable, as a Syrian person. Measures were adapted  
5 from a validated instrument of internalized HIV-related stigma[15].  
6  
7

8  
9  
10 *Displacement-related stressors.* Syrian participants reported on two stressors related to  
11 displacement. As a measure of unstable housing, Syrian participants reported how many  
12 locations they had lived in since moving to Lebanon. As a measure of legal status, Syrian  
13 participants reported whether they had an official visa or permit in Lebanon.  
14  
15

16  
17  
18 *Mental health.* Depression was measured by the 20-item self-report Center for Epidemiologic  
19 Studies Depression Scale (CES-D) with a cutoff score of  $\geq 16$  suggesting the presence of  
20 clinically significant depressive symptoms[16]. Anxiety was assessed by the 21-item self-report  
21 Beck Anxiety Inventory (BAI) with a cutoff score of  $\geq 26$  suggesting the presence of severe  
22 anxiety[17]. Posttraumatic stress was measured by the 17-item self-report Posttraumatic Stress  
23 Disorder CheckList for Civilians (PCL-C) with a cutoff score of  $\geq 50$  suggesting probable  
24 posttraumatic stress disorder[18]. The CES-D, BAI, and PCL-C have been employed as valid  
25 instruments assessing depression, anxiety severity, and posttraumatic stress disorder,  
26 respectively, in Arabic-speaking community and displaced populations[19-21].  
27  
28  
29  
30  
31  
32  
33  
34  
35  
36  
37  
38  
39  
40  
41

## 42 **Statistical Analysis**

43  
44  
45 Analyses were conducted in SAS version 9.4 and proceeded in three steps. First, descriptive  
46 statistics were used to assess socio-demographic, stigma-related stressors, and mental health  
47 differences between Lebanese-born and Syrian-born MSM and transgender women. Second,  
48 simple linear regression models examined unadjusted associations between socio-demographic  
49 factors, displacement status (Lebanese-born versus displaced Syrian), and each mental health  
50  
51  
52  
53  
54  
55  
56

outcome. Variables that showed significant associations at  $p < 0.05$  in bivariate models were retained in adjusted multivariable linear regression models. Missing covariate data were imputed via multiple imputation procedures[22]. Third, we restricted analyses to displaced Syrians and conducted bivariate and multivariable linear regression analyses to assess the unadjusted and adjusted associations, respectively, between socio-demographic characteristics, displacement-related stressors, stigma-related stressors (i.e., discrimination, assault, internalized sexual minority and Syrian stigma), and each mental health outcome. Supplemental logistic regression analyses mirrored the primary analyses but assessed the presence of psychiatric morbidity utilizing binary indicators of mental health cutoffs as outcomes.

## RESULTS

Bivariate analyses showed that displaced Syrians were younger, had less educational attainment, and had lower monthly income than Lebanese participants (see **Table 1**). In total, 86.4% of the sample identified as a man, and 13.6% of participants identified as a woman, transgender woman, or other gender identity.

| Table 1. Sample characteristics among Lebanese and displaced Syrian MSM and transgender women recruited through respondent driven sampling in Lebanon, $N = 488$ |                                  |            |                                          |            |                      |
|------------------------------------------------------------------------------------------------------------------------------------------------------------------|----------------------------------|------------|------------------------------------------|------------|----------------------|
| Socio-demographic variable                                                                                                                                       | Lebanese<br>( $n = 258$ ; 52.3%) |            | Displaced Syrian<br>( $n = 230$ ; 47.1%) |            | Chi-sq or<br>t value |
|                                                                                                                                                                  | n or<br>Mean                     | % or<br>SD | n or<br>Mean                             | % or<br>SD |                      |
| Age ( $n = 486$ )                                                                                                                                                | 28.0                             | 7.08       | 26.0                                     | 4.60       | 3.85***              |
| Household size ( $n = 482$ )                                                                                                                                     | 3.98                             | 2.08       | 3.72                                     | 2.13       | 1.35                 |
| Gender Identity ( $n = 420$ )                                                                                                                                    |                                  |            |                                          |            | 0.74                 |
| Man                                                                                                                                                              | 203                              | 85.7       | 160                                      | 87.4       |                      |
| Woman or Transgender Woman                                                                                                                                       | 26                               | 11.0       | 19                                       | 10.4       |                      |
| Other                                                                                                                                                            | 8                                | 3.4        | 4                                        | 2.2        |                      |
| Education level                                                                                                                                                  |                                  |            |                                          |            | 28.87***             |
| Did not complete primary school                                                                                                                                  | 10                               | 3.9        | 11                                       | 4.8        |                      |
| Completed primary school                                                                                                                                         | 47                               | 18.2       | 70                                       | 30.4       |                      |

|                                            |     |      |     |      |          |
|--------------------------------------------|-----|------|-----|------|----------|
| Completed secondary school                 | 46  | 17.8 | 43  | 18.7 |          |
| Some college or university                 | 52  | 20.2 | 63  | 27.4 |          |
| Completed university                       | 103 | 39.9 | 43  | 18.7 |          |
| Income (monthly, US dollars) ( $n = 480$ ) |     |      |     |      | 93.48*** |
| \$0-500                                    | 91  | 35.7 | 147 | 65.3 |          |
| \$501-1000                                 | 66  | 25.9 | 72  | 32.0 |          |
| \$1001-2000                                | 65  | 25.5 | 5   | 2.2  |          |
| \$2001-4000                                | 32  | 12.6 | 1   | 0.4  |          |
| Greater than \$4000                        | 1   | 0.4  | 0   | 0.0  |          |
| Relationship status ( $n = 486$ )          |     |      |     |      | 0.91     |
| Single                                     | 168 | 65.4 | 159 | 69.4 |          |
| Partnered                                  | 89  | 34.6 | 70  | 30.6 |          |
| Gender of partner ( $n = 159$ )            |     |      |     |      | 2.61     |
| Cisgender man                              | 78  | 87.6 | 63  | 90.0 |          |
| Cisgender woman                            | 2   | 2.3  | 1   | 1.4  |          |
| Transgender man                            | 1   | 1.1  | 0   | 0.0  |          |
| Transgender woman                          | 4   | 4.5  | 5   | 7.1  |          |
| Other (e.g., Gender non-conforming)        | 4   | 4.5  | 1   | 1.4  |          |
| * $p < 0.05$ ** $p < 0.01$ *** $p < 0.001$ |     |      |     |      |          |

Prevalence of psychiatric morbidity in the sample was generally high (see **Table 2**). Sixty-three percent of Syrians met or exceeded the cutoff for depression compared to 43.8% of Lebanese participants ( $p < 0.001$ ). Approximately 21.3% of Syrians met criteria for severe anxiety compared to 13.1% of Lebanese participants ( $p < 0.05$ ). Thirty-three percent of Syrians were considered to have posttraumatic stress disorder compared to 18.4% of Lebanese participants ( $p < 0.001$ ). Syrian participants reported higher stigma-related stress including internalized sexual minority stigma and greater exposure to recent discrimination and assault than Lebanese-born participants.

| Table 2. Mental health and stigma differences between Lebanese and displaced Syrian MSM and transgender women, $N = 488$ |                                  |            |                                          |            |                      |
|--------------------------------------------------------------------------------------------------------------------------|----------------------------------|------------|------------------------------------------|------------|----------------------|
| Mental health or stigma variable                                                                                         | Lebanese<br>( $n = 258$ ; 52.3%) |            | Displaced Syrian<br>( $n = 230$ ; 47.1%) |            | Chi-sq or<br>t value |
|                                                                                                                          | n or<br>Mean                     | % or<br>SD | n or<br>Mean                             | % or<br>SD |                      |

|                                                                                                                                                                                      |       |       |       |       |          |
|--------------------------------------------------------------------------------------------------------------------------------------------------------------------------------------|-------|-------|-------|-------|----------|
| Depression <sup>a</sup> (range: 0 - 60)                                                                                                                                              | 16.79 | 14.33 | 23.15 | 15.16 | 4.76***  |
| Depression cutoff <sup>a</sup> (n, %)                                                                                                                                                | 113   | 43.8  | 145   | 63.0  | 18.07*** |
| Anxiety <sup>b</sup> (range: 0 - 63)                                                                                                                                                 | 11.05 | 12.32 | 14.89 | 13.77 | 3.25**   |
| Severe anxiety cutoff <sup>b</sup> (n, %)                                                                                                                                            | 34    | 13.1  | 49    | 21.3  | 5.68*    |
| Posttraumatic Stress <sup>c</sup> ( <i>n</i> = 468; range: 17 - 84)                                                                                                                  | 32.91 | 16.57 | 41.63 | 17.00 | 5.62***  |
| Posttraumatic stress disorder cutoff <sup>c</sup> ( <i>n</i> = 468; <i>n</i> , %)                                                                                                    | 45    | 18.4  | 74    | 33.0  | 13.11*** |
| Internalized sexual minority stigma (range: 6 - 30)                                                                                                                                  | 13.27 | 5.14  | 16.50 | 6.37  | 6.12***  |
| Internalized Syrian stigma (range: 6 - 30)                                                                                                                                           | --    | --    | 13.97 | 7.23  | --       |
| Sexual minority discrimination (range: 0 - 5)                                                                                                                                        | 0.50  | 1.04  | 0.77  | 1.13  | 2.73**   |
| Sexual minority assault (range: 0 - 3)                                                                                                                                               | 0.76  | 0.88  | 1.16  | 1.09  | 4.38***  |
| * <i>p</i> < 0.05 ** <i>p</i> < 0.01 *** <i>p</i> < 0.001                                                                                                                            |       |       |       |       |          |
| <sup>a</sup> Depression measured by the Center for Epidemiological Studies Depression (CES-D). Clinical depression cutoff denoted by a score of 16 or greater on the CES-D.          |       |       |       |       |          |
| <sup>b</sup> Anxiety assessed by the Beck Anxiety Inventory (BAI). Severe anxiety cutoff denoted by a score of 26 or greater on the BAI.                                             |       |       |       |       |          |
| <sup>c</sup> Posttraumatic Stress measured by the PTSD Check List – Civilian Version (PCL-C). Posttraumatic stress disorder cutoff denoted by a score of 50 or greater on the PCL-C. |       |       |       |       |          |

Syrian MSM and transgender women experienced higher levels of depression and posttraumatic stress than Lebanese-born MSM and transgender women in crude and adjusted models (see **Table 3**). The association between displacement status and anxiety did not reach significance after adjusting for socio-demographics. In supplemental analyses, Syrians demonstrated a trend of 1.23 greater odds of both depression and post-traumatic stress disorder than Lebanese-born participants in adjusted models (see **Supplemental Table 1**). Across models, transgender-identified participants demonstrated greater psychiatric morbidity than cisgender participants.

1  
2  
3  
4  
5  
6  
7  
8  
9  
10  
11  
12  
13  
14  
15  
16  
17  
18  
19  
20  
21  
22  
23  
24  
25  
26  
27  
28  
29  
30  
31  
32  
33  
34  
35  
36  
37  
38  
39  
40  
41  
42  
43  
44  
45  
46  
47  
48  
49  
50  
51  
52  
53  
54  
55  
56  
57  
58  
59  
60

For peer review only

Table 3. Linear regression models regressing mental health on socio-demographic characteristics and displacement status among Lebanese and displaced Syrian MSM and transgender women in Lebanon,  $N = 488$ 

| Variable                               | Depression (CES-D)     |            |                          |            | Anxiety (BAI)          |            |                          |            | Post-Traumatic Stress (PCL-C) ( $N = 468$ ) |            |                          |            |
|----------------------------------------|------------------------|------------|--------------------------|------------|------------------------|------------|--------------------------|------------|---------------------------------------------|------------|--------------------------|------------|
|                                        | Unadjusted (Bivariate) |            | Adjusted (Multivariable) |            | Unadjusted (Bivariate) |            | Adjusted (Multivariable) |            | Unadjusted (Bivariate)                      |            | Adjusted (Multivariable) |            |
|                                        | <i>Est.</i>            | <i>SE</i>  | <i>Est.</i>              | <i>SE</i>  | <i>Est.</i>            | <i>SE</i>  | <i>Est.</i>              | <i>SE</i>  | <i>Est.</i>                                 | <i>SE</i>  | <i>Est.</i>              | <i>SE</i>  |
| Age                                    | -0.22                  | 0.11       | -0.03                    | 0.10       | -0.04                  | 0.10       | --                       | --         | -0.26                                       | 0.13       | -0.03                    | 0.12       |
| Household Size                         | <b>-1.14***</b>        | 0.32       | <b>-0.89**</b>           | 0.29       | <b>-0.55†</b>          | 0.28       | -0.33                    | 0.26       | <b>-1.68***</b>                             | 0.37       | <b>-1.50***</b>          | 0.38       |
| Gender Identity                        |                        |            |                          |            |                        |            |                          |            |                                             |            |                          |            |
| Cisgender                              | <i>ref</i>             | <i>ref</i> | <i>ref</i>               | <i>ref</i> | <i>ref</i>             | <i>ref</i> | <i>ref</i>               | <i>ref</i> | <i>ref</i>                                  | <i>ref</i> | <i>ref</i>               | <i>ref</i> |
| Transgender or other (e.g., nonbinary) | <b>11.58***</b>        | 2.01       | <b>6.14***</b>           | 1.87       | <b>10.60***</b>        | 1.73       | <b>6.69***</b>           | 1.67       | <b>11.52***</b>                             | 2.34       | <b>11.92***</b>          | 2.57       |
| Education level                        |                        |            |                          |            |                        |            |                          |            |                                             |            |                          |            |
| Completed primary school or less       | <i>ref</i>             | <i>ref</i> | <i>ref</i>               | <i>ref</i> | <i>ref</i>             | <i>ref</i> | <i>ref</i>               | <i>ref</i> | <i>ref</i>                                  | <i>ref</i> | <i>ref</i>               | <i>ref</i> |
| Completed more than primary school     | <b>-10.26***</b>       | 1.44       | <b>-6.38***</b>          | 1.37       | <b>-6.86***</b>        | 1.28       | <b>-3.49**</b>           | 1.23       | <b>-11.06***</b>                            | 1.65       | <b>-11.60***</b>         | 1.69       |
| Income (monthly)                       |                        |            |                          |            |                        |            |                          |            |                                             |            |                          |            |
| \$0-500                                | <i>ref</i>             | <i>ref</i> | <i>ref</i>               | <i>ref</i> | <i>ref</i>             | <i>ref</i> | <i>ref</i>               | <i>ref</i> | <i>ref</i>                                  | <i>ref</i> | <i>ref</i>               | <i>ref</i> |
| \$501 or more                          | <b>-11.77***</b>       | 1.25       | <b>-8.01***</b>          | 1.32       | <b>-10.00***</b>       | 1.10       | <b>-7.58***</b>          | 1.18       | <b>-13.52***</b>                            | 1.46       | <b>-13.47***</b>         | 1.49       |
| Relationship status                    |                        |            |                          |            |                        |            |                          |            |                                             |            |                          |            |
| Single                                 | <i>ref</i>             | <i>ref</i> | <i>ref</i>               | <i>ref</i> | <i>ref</i>             | <i>ref</i> | <i>ref</i>               | <i>ref</i> | <i>ref</i>                                  | <i>ref</i> | <i>ref</i>               | <i>ref</i> |
| Partnered                              | <b>-4.70**</b>         | 1.44       | <b>-5.48***</b>          | 1.28       | <b>-4.45***</b>        | 1.26       | <b>-4.84***</b>          | 1.15       | <b>-4.75**</b>                              | 1.66       | <b>-4.95**</b>           | 1.69       |
| Displacement status                    |                        |            |                          |            |                        |            |                          |            |                                             |            |                          |            |
| Lebanese (not displaced)               | <i>ref</i>             | <i>ref</i> | <i>ref</i>               | <i>ref</i> | <i>ref</i>             | <i>ref</i> | <i>ref</i>               | <i>ref</i> | <i>ref</i>                                  | <i>ref</i> | <i>ref</i>               | <i>ref</i> |
| Displaced Syrian                       | <b>6.36***</b>         | 1.33       | <b>2.75*</b>             | 1.26       | <b>3.84**</b>          | 1.18       | 1.00                     | 1.13       | <b>8.35***</b>                              | 1.52       | <b>8.73***</b>           | 1.55       |

Notation and bolding used to denote significance: †  $p < 0.10$ ; \*  $p < 0.05$ ; \*\*  $p < 0.01$ ; \*\*\*  $p < 0.001$

*Est.* = Estimate; *SE* = standard error

CES-D = Center for Epidemiologic Studies Depression Scale; BAI = Beck Anxiety Inventory; PCL-C = PTSD Check List – Civilian Version



1  
2  
3 Among Syrian MSM and transgender women, socio-demographic characteristics, displacement-  
4 related stressors, and stigma-related stressors all served as determinants of psychiatric morbidity  
5 as assessed by multiple linear regression models (see **Table 4**). Regarding socio-demographic  
6 characteristics, lower monthly income and not being in a relationship were significantly  
7 associated with higher levels of depression, anxiety, and posttraumatic stress. In terms of  
8 displacement-related stressors, the greater number of locations lived since migrating to Lebanon  
9 was associated with higher anxiety ( $\beta=.50$ ;  $p < 0.01$ ) and posttraumatic stress ( $\beta=.52$ ;  $p < 0.01$ ).  
10 Participants who did not have legal status reported higher depression ( $\beta=3.63$ ,  $p < 0.05$ ), anxiety  
11 ( $\beta=4.14$ ,  $p < 0.05$ ), and posttraumatic stress ( $\beta=5.81$ ,  $p < 0.01$ ) than those with legal status.  
12 Exposure to past-year sexual minority discrimination ( $\beta=2.16$ ,  $p < 0.05$ ) and assault ( $\beta=2.23$ ,  $p <$   
13  $0.05$ ) were each associated with higher depression, while internalized sexual minority stigma was  
14 marginally associated ( $\beta=0.33$ ,  $p < 0.10$ ) and internalized Syrian stigma was not associated with  
15 depression. Exposure to sexual minority discrimination ( $\beta=2.29$ ,  $p < 0.01$ ) and internalized  
16 Syrian stigma ( $\beta=0.24$ ,  $p < 0.05$ ) were associated with more severe anxiety. The only stigma-  
17 related stressor significantly associated with posttraumatic stress was sexual minority assault  
18 ( $\beta=2.31$ ,  $p < 0.05$ ). Supplemental logistic regression analyses demonstrated similar, but  
19 somewhat attenuated, results to linear regression analyses perhaps due to limited power (see  
20 **Supplemental Table 2**).

Table 4. Linear regression models regressing mental health on socio-demographic characteristics, displacement-related stressors, and stigma-related stressors among displaced Syrian MSM and transgender women in Lebanon, *N* = 230

| Variable                                                | Depression (CES-D)     |            |                          |            | Anxiety (BAI)          |            |                          |            | Post-Traumatic Stress (PCL-C) (N = 224) |            |                          |            |
|---------------------------------------------------------|------------------------|------------|--------------------------|------------|------------------------|------------|--------------------------|------------|-----------------------------------------|------------|--------------------------|------------|
|                                                         | Unadjusted (Bivariate) |            | Adjusted (Multivariable) |            | Unadjusted (Bivariate) |            | Adjusted (Multivariable) |            | Unadjusted (Bivariate)                  |            | Adjusted (Multivariable) |            |
|                                                         | <i>Est.</i>            | <i>SE</i>  | <i>Est.</i>              | <i>SE</i>  | <i>Est.</i>            | <i>SE</i>  | <i>Est.</i>              | <i>SE</i>  | <i>Est.</i>                             | <i>SE</i>  | <i>Est.</i>              | <i>SE</i>  |
| <b>Socio-demographic characteristics</b>                |                        |            |                          |            |                        |            |                          |            |                                         |            |                          |            |
| Age                                                     | -0.33                  | 0.22       | --                       | --         | -0.13                  | 0.20       | --                       | --         | <b>-0.51*</b>                           | 0.24       | 0.12                     | 0.22       |
| Household Size                                          | -0.17                  | 0.47       | --                       | --         | -0.04                  | 0.44       | --                       | --         | -0.51                                   | 0.55       | --                       | --         |
| Gender Identity                                         |                        |            |                          |            |                        |            |                          |            |                                         |            |                          |            |
| Cisgender                                               | <i>ref</i>             | <i>ref</i> | <i>ref</i>               | <i>ref</i> | <i>ref</i>             | <i>ref</i> | <i>ref</i>               | <i>ref</i> | <i>ref</i>                              | <i>ref</i> | <i>ref</i>               | <i>ref</i> |
| Transgender or other (e.g., nonbinary)                  | <b>6.86*</b>           | 3.23       | 0.70                     | 3.21       | <b>10.25***</b>        | 2.69       | 2.89                     | 2.67       | <b>9.01*</b>                            | 3.50       | 1.92                     | 3.36       |
| Education level                                         |                        |            |                          |            |                        |            |                          |            |                                         |            |                          |            |
| Completed primary school or less                        | <i>ref</i>             | <i>ref</i> | <i>ref</i>               | <i>ref</i> | <i>ref</i>             | <i>ref</i> | <i>ref</i>               | <i>ref</i> | <i>ref</i>                              | <i>ref</i> | <i>ref</i>               | <i>ref</i> |
| Completed more than primary school                      | <b>-6.93***</b>        | 2.04       | -2.95                    | 1.98       | <b>-4.49*</b>          | 1.87       | -2.35                    | 1.69       | <b>-7.30**</b>                          | 2.31       | -3.22                    | 2.21       |
| Income (monthly)                                        |                        |            |                          |            |                        |            |                          |            |                                         |            |                          |            |
| \$0-500                                                 | <i>ref</i>             | <i>ref</i> | <i>ref</i>               | <i>ref</i> | <i>ref</i>             | <i>ref</i> | <i>ref</i>               | <i>ref</i> | <i>ref</i>                              | <i>ref</i> | <i>ref</i>               | <i>ref</i> |
| \$501 or more                                           | <b>-7.89***</b>        | 2.04       | <b>-6.02**</b>           | 1.89       | <b>-7.71***</b>        | 1.83       | <b>-5.36**</b>           | 1.74       | <b>-9.14***</b>                         | 2.35       | <b>-7.40***</b>          | 2.19       |
| Relationship status                                     |                        |            |                          |            |                        |            |                          |            |                                         |            |                          |            |
| Single                                                  | <i>ref</i>             | <i>ref</i> | <i>ref</i>               | <i>ref</i> | <i>ref</i>             | <i>ref</i> | <i>ref</i>               | <i>ref</i> | <i>ref</i>                              | <i>ref</i> | <i>ref</i>               | <i>ref</i> |
| Partnered                                               | <b>-5.00*</b>          | 2.14       | <b>-3.58†</b>            | 1.88       | <b>-3.29†</b>          | 1.97       | <b>-3.73*</b>            | 1.75       | <b>-6.11*</b>                           | 2.43       | <b>-5.42*</b>            | 2.13       |
| <b>Displacement-related stressors</b>                   |                        |            |                          |            |                        |            |                          |            |                                         |            |                          |            |
| Number of locations lived since moving to Lebanon       | <b>0.74***</b>         | 0.17       | <b>0.37†</b>             | 0.17       | <b>0.86***</b>         | 0.16       | <b>0.50**</b>            | 0.15       | <b>0.91***</b>                          | 0.77       | <b>0.52**</b>            | 0.19       |
| Legal status in Lebanon (e.g., official visa or permit) |                        |            |                          |            |                        |            |                          |            |                                         |            |                          |            |
| Does not have legal status                              | <i>ref</i>             | <i>ref</i> | <i>ref</i>               | <i>ref</i> | <i>ref</i>             | <i>ref</i> | <i>ref</i>               | <i>ref</i> | <i>ref</i>                              | <i>ref</i> | <i>ref</i>               | <i>ref</i> |
| Has legal status                                        | <b>-9.04***</b>        | 1.97       | <b>-3.63*</b>            | 1.87       | <b>-8.70***</b>        | 1.78       | <b>-4.14*</b>            | 1.71       | <b>-11.36***</b>                        | 2.21       | <b>-5.81**</b>           | 2.12       |
| <b>Stigma-related stressors</b>                         |                        |            |                          |            |                        |            |                          |            |                                         |            |                          |            |
| Sexual minority discrimination                          | <b>5.05***</b>         | 0.82       | <b>2.16*</b>             | 0.92       | <b>5.04***</b>         | 0.73       | <b>2.29**</b>            | 0.83       | <b>5.47***</b>                          | 0.95       | 1.62                     | 1.05       |
| Sexual minority assault                                 | <b>5.76***</b>         | 0.83       | <b>2.23*</b>             | 0.94       | <b>4.40***</b>         | 0.78       | 0.57                     | 0.86       | <b>6.43***</b>                          | 0.94       | <b>2.31*</b>             | 1.09       |
| Internalized sexual minority stigma                     | <b>0.51**</b>          | 0.15       | <b>0.33†</b>             | 0.18       | 0.19                   | 0.14       | --                       | --         | <b>0.54**</b>                           | 0.17       | 0.30                     | 0.21       |
| Internalized Syrian stigma                              | <b>0.70***</b>         | 0.13       | 0.20                     | 0.16       | <b>0.49***</b>         | 0.12       | <b>0.24*</b>             | 0.12       | <b>0.78***</b>                          | 0.15       | 0.26                     | 0.18       |

|                                                                                                                                                                                                                                                                                                                                                                       |
|-----------------------------------------------------------------------------------------------------------------------------------------------------------------------------------------------------------------------------------------------------------------------------------------------------------------------------------------------------------------------|
| <p>Notation and bolding used to denote significance: † <math>p &lt; 0.10</math>; * <math>p &lt; 0.05</math>; ** <math>p &lt; 0.01</math>; *** <math>p &lt; 0.001</math><br/> <i>Est.</i> = Estimate; SE = standard error<br/> CES-D = Center for Epidemiologic Studies Depression Scale; BAI = Beck Anxiety Inventory; PCL-C = PTSD Check List – Civilian Version</p> |
|-----------------------------------------------------------------------------------------------------------------------------------------------------------------------------------------------------------------------------------------------------------------------------------------------------------------------------------------------------------------------|

1  
2  
3  
4  
5  
6  
7  
8  
9  
10  
11  
12  
13  
14  
15  
16  
17  
18  
19  
20  
21  
22  
23  
24  
25  
26  
27  
28  
29  
30  
31  
32  
33  
34  
35  
36  
37  
38  
39  
40  
41  
42  
43  
44  
45  
46  
47

For peer review only

## DISCUSSION

To our knowledge, this study represents the first study to document the prevalence and determinants of psychiatric morbidity among displaced Syrian MSM and transgender women.

Our data, accrued by respondent-driven sampling in 2019, showed substantially elevated prevalence of depression, anxiety, and posttraumatic stress disorder among displaced Syrian MSM and transgender women compared to Lebanese MSM and transgender women.

Findings from the current study are consistent with prior research showing that depression, anxiety, and posttraumatic stress disorder are elevated among both MSM and transgender women and individuals displaced by armed conflict[2-4,10-12]. In support of minority stress theory[10] and intersectionality theory,[23] displaced Syrian MSM and transgender women in the sample experienced a confluence of stigma-related and displacement-related stressors in response to their interlocking minority statuses as both a sexual or gender minority and displaced person. Exposure to such stressors can influence psychiatric morbidity through underlying cognitive processes[24]. For example, the learned helplessness theory of depression posits that individuals who experience an aversive, uncontrollable event can become helpless due to feeling a lack of control over their circumstances[25]. Those who attribute the cause of such an aversive, uncontrollable event to internal (i.e., due to the person themselves), global (i.e., affecting the person's whole life), and stable (i.e., unchangeable) factors are most likely to become depressed[25]. Stigma-related stress events – including discrimination on the basis of minority or displacement status – can be viewed as uncontrollable and global[24]. When an individual believes themselves the cause of stigma-related stress events, they are more likely to develop

1  
2  
3 depression. Among displaced Syrian MSM and transgender women in the current study, sexual  
4 minority-related discrimination and assault and internalized sexual minority stigma were  
5 associated with greater depression while internalized Syrian stigma was not associated with  
6 greater depression. Displaced Syrian MSM and transgender women might view their sexual or  
7 gender identity status as having an internal cause (i.e., being innate) versus their displaced Syrian  
8 status as having an external cause (i.e., war); MSM and transgender-related stigma might,  
9 therefore, be more strongly associated with depression than displacement-related stigma.

10  
11  
12 Research on the etiology of anxiety disorders suggests that accounting for contextual influences  
13 is critical for understanding how aversive events (e.g., stigma-related discrimination and  
14 violence) can lead to anxiety or posttraumatic stress disorder[26]. Modern learning theorists  
15 suggest that differences in individual factors affect the strength of fear that is conditioned by  
16 aversive events[26]. Such individual-level differences include previous exposure to traumatic or  
17 aversive events, the context of the aversive event (e.g., whether the event is controllable or  
18 uncontrollable), and post-event experiences (e.g., an inflation effect such that the strength of  
19 milder fears can be inflated by subsequent traumatic events). On average, almost two-thirds of  
20 displaced Syrians in the current study reported experiencing at least one form of verbal  
21 harassment, physical abuse, or sexual assault due to their sexual minority status in the past 12  
22 months. We theorize that such stigma-related stress events are especially likely to lead to anxiety  
23 and posttraumatic stress disorder due to the perception of stigma-related stressors as pervasive  
24 and uncontrollable. Further, the mental health toll of such stigma-related events might be inflated  
25 by displaced Syrian MSM and transgender women's likely exposure to previous traumatic or  
26 aversive events due to their intersecting statuses[7,24]. In support of this theory, displaced Syrian  
27  
28  
29  
30  
31  
32  
33  
34  
35  
36  
37  
38  
39  
40  
41  
42  
43  
44  
45  
46  
47  
48  
49  
50  
51  
52  
53  
54  
55  
56  
57  
58  
59  
60

1  
2  
3 MSM and transgender women demonstrated substantially higher risk of posttraumatic stress  
4  
5 disorder than Lebanese MSM and transgender women.  
6  
7

8  
9 The high prevalence of psychiatric co-morbidities in this study delineates the need for mental  
10  
11 health support for displaced Syrian MSM and transgender women. UNHCR and other  
12  
13 humanitarian programs have emphasized that mental health interventions for vulnerable  
14  
15 subgroups of displaced Syrians are critical to reducing psychiatric morbidity and associated  
16  
17 distress, yet very few exist[4]. For displaced Syrian MSM and transgender women, mental health  
18  
19 interventions should be attuned to the unique intersections of sexual or gender minority and  
20  
21 displacement status that include coping with stigma and trauma while increasing personal  
22  
23 mastery in the face of unchangeable stressors (e.g., stigmatizing societal attitudes) and  
24  
25 uncertainty (e.g., regarding legal status). Promising qualitative results were recently published  
26  
27 from a pilot study assessing the first mental health/HIV intervention for transgender women in  
28  
29 the Middle East. Named Baynetna and conducted in Lebanon, it includes six modules conducted  
30  
31 in a weekly, peer-led, group-based format covering topics including transphobia, violence,  
32  
33 family rejection, self-esteem as well as psychoeducational content related to sexual risk[27]. In a  
34  
35 sample of 16 transgender women (including three displaced individuals), preliminary results  
36  
37 showed that Baynetna was feasible, acceptable, and promising trends emerged in increasing  
38  
39 social support and reducing mental health symptoms. While only a randomized-controlled trial  
40  
41 can confirm the efficacy of Baynetna, results from the pilot study suggest that mental health  
42  
43 interventions targeting MSM and transgender women in Lebanon might benefit from engaging  
44  
45 members through a support group-based format. Recent qualitative evidence from a social  
46  
47 support group for LGBTQ refugees in Canada further bolsters the promise of such group-based  
48  
49 formats for delivering mental health intervention content in a supportive space to normalize  
50  
51  
52  
53  
54  
55  
56  
57  
58  
59  
60

1  
2  
3 stigmatizing experiences, share coping skills and material resources (e.g., employment  
4 opportunities), build social support and community connectedness, and buffer feelings of  
5  
6 isolation and loneliness associated with poor mental health[28]. Mental health interventions for  
7  
8 displaced Syrian MSM and transgender women might incorporate tenets of cognitive-behavioral  
9  
10 treatment from minority-stress-mental-health treatments that have recently demonstrated efficacy  
11  
12 in reducing depression and anxiety symptoms among gender-diverse populations of sexual  
13  
14 minorities in the US[29] including in a group-based format with racial/ethnic minority MSM that  
15  
16 was adapted based on the framework of intersectionality theory (Skyler Jackson, et al., 2020,  
17  
18 unpublished manuscript).

19  
20  
21 While several aspects of the current study represent notable strengths, including a large sample  
22  
23 recruited by respondent-driven sampling and validated measures assessing psychiatric morbidity,  
24  
25 the current study is limited in its cross-sectional design that precludes causal inference of  
26  
27 determinants of psychiatric morbidity. Studies employing a prospective design are warranted to  
28  
29 identify longitudinal predictors and uncover mediators of poorer mental health among displaced  
30  
31 Syrian MSM and transgender women. Additionally, the study was designed for MSM, and, while  
32  
33 the relatively large proportion of transgender women we recruited represents a relative strength,  
34  
35 the study measures did not assess stigma-related stressors specific to gender identity. Future  
36  
37 studies should incorporate measures assessing experiences related to identifying as a transgender  
38  
39 woman versus MSM. Last, measures assessing external stigma-related experiences (i.e.,  
40  
41 discrimination and assault) asked about events related to sexual minority status and did not  
42  
43 assess discrimination or assault related to Syrian nationality. Assessing the relative impact of  
44  
45 discrimination or assault based on MSM and transgender women status versus displaced Syrian  
46  
47  
48  
49  
50  
51  
52  
53  
54  
55  
56  
57  
58  
59  
60

1  
2  
3 status can further clarify the influence of stigma attribution on psychiatric morbidity in this  
4  
5 population.  
6

7  
8 In support of minority stress theory and aligned with intersectionality theory, displaced Syrian  
9  
10 MSM and transgender women experience higher levels of depression, anxiety, and posttraumatic  
11  
12 stress disorder than Lebanese MSM and transgender women in part due to identity-related  
13  
14 stigmatization and displacement-related stressors. Mental health interventions are needed among  
15  
16 displaced Syrian MSM and transgender women and might incorporate tenets of cognitive-  
17  
18 behavioral science and modern learning theory including stigma-coping and personal mastery  
19  
20 content. Such content should focus on building resilience and tackle underlying cognitive  
21  
22 processes among those who have faced recurrent, uncontrollable, adverse events (e.g., identity-  
23  
24 related assault and rejection, conflict-related trauma and displacement) based on their dual-  
25  
26 minority status as an MSM or transgender women and a displaced person. Mental health  
27  
28 interventions for displaced Syrian MSM and transgender women delivered in a support group  
29  
30 format may be well-poised to offer a supportive, community-based environment while also  
31  
32 representing a cost-effective modality.  
33  
34  
35  
36  
37  
38  
39  
40  
41  
42  
43  
44  
45  
46  
47  
48  
49  
50  
51  
52  
53  
54  
55  
56  
57  
58  
59  
60



## ACKNOWLEDGEMENTS

This project was funded by the National Institute of Child and Human Development (R21HD089820).

## DATA SHARING

Data is available by emailing Robert Heimer at Robert.Heimer@yale.edu or corresponding at Robert Heimer, Yale School of Public Health, 60 College St., PO Box 208034, New Haven, CT, USA 06520-8034

## AUTHOR CONTRIBUTION STATEMENT

KAC, JEP, RBränström, and RH conceptualised the manuscript. KK, FMF, DWS, and RH supervised the study. DK collected data. KAC and RBarbour ran the analyses. KAC prepared the first draft of the Article and revised it based on feedback from JEP, RBränström, KK, DK, DWS, and RH. All authors reviewed and approved the Article.

## REFERENCES

1. UNHCR The UN Refugee Agency. Lebanon: Fact Sheet 2020 [Available from: <https://reporting.unhcr.org/sites/default/files/UNHCR%20Lebanon%20Fact%20Sheet%20-%20January%202020.pdf>].
2. Kazour F, Zahreddine NR, Maragel MG, et al. Post-traumatic stress disorder in a sample of Syrian refugees in Lebanon. *Comprehensive Psychiatry*. 2017;72:41-7.
3. Naja WJ, Aoun MP, El Khoury EL, et al. Prevalence of depression in Syrian refugees and the influence of religiosity. *Comprehensive psychiatry*. 2016;68:78-85.
4. Abou-Saleh MT, Hughes P. Mental health of Syrian refugees: looking backwards and forwards. *The Lancet Psychiatry*. 2015;2(10):870-1.
5. Yassin N, Osseiran T, Rassi R, et al. No place to stay? Reflections on the Syrian refugee shelter policy in Lebanon. Beirut, Lebanon: United Nations Human Settlements Programme and the American University of Beirut, 2015.
6. Orr L, Shebl FM, Heimer R, et al. Violence and discrimination against men who have sex with men in Lebanon: the role of international displacement and migration. *Journal of interpersonal violence* 2019:0886260519884684.
7. Alessi EJ, Kahn S, Woolner L, et al. Traumatic stress among sexual and gender minority refugees from the Middle East, North Africa, and Asia who fled to the European Union. *Journal of traumatic stress*. 2018;31(6):805-15.
8. Wagner GJ, Aunon FM, Kaplan RL, et al. Sexual stigma, psychological well-being and social engagement among men who have sex with men in Beirut, Lebanon. *Culture, health & sexuality*. 2013;15(5):570-82.
9. Kaplan RL, Nehme S, Aunon F, et al. Suicide risk factors among trans feminine individuals in Lebanon. *International journal of transgenderism*. 2016;17(1):23-30..
10. Meyer IH. Prejudice, social stress, and mental health in lesbian, gay, and bisexual populations: conceptual issues and research evidence. *Psychological bulletin* 2003;129(5):674.
11. Batchelder AW, Safren S, Mitchell AD, et al. Mental health in 2020 for men who have sex with men in the United States. *Sexual health*. 2017;14(1):59-71.
12. Reisner SL, Poteat T, Keatley J, et al. Global health burden and needs of transgender populations: a review. *The Lancet*. 2016;388(10042):412-36.
13. Wagner GJ, Ghosh-Dastidar B, El Khoury C, et al. Major depression among young men who have sex with men in Beirut, and its association with structural and sexual minority-related stressors, and social support. *Sexuality research and social policy*. 2019;16(4):513-20.
14. Heckathorn DD. Respondent-driven sampling: a new approach to the study of hidden populations. *Social problems*. 1997;44(2):174-99.
15. Kalichman SC, Simbayi LC, Cloete A, et al. Measuring AIDS stigmas in people living with HIV/AIDS: the Internalized AIDS-Related Stigma Scale. *AIDS care*. 2009;21(1):87-93.
16. Radloff LS. The CES-D scale: A self-report depression scale for research in the general population. *Applied psychological measurement*. 1977;1(3):385-401.
17. Ulusoy M, Sahin NH, Erkmen H. The Beck anxiety inventory: psychometric properties. *J Cogn Psychother*. 1998;12(2):163-72.
18. Ruggiero KJ, Del Ben K, Scotti JR, et al. Psychometric properties of the PTSD Checklist—Civilian version. *Journal of traumatic stress*. 2003;16(5):495-502.

19. Thapa SB, Hauff E. Psychological distress among displaced persons during an armed conflict in Nepal. *Social psychiatry and psychiatric epidemiology*. 2005;40(8):672-9.
20. Kazarian SS, Taher D. Validation of the Arabic Center for Epidemiological Studies Depression (CES-D) scale in a Lebanese community sample. *European Journal of Psychological Assessment* 2010;26(1):68-73.
21. Kira IA, Ramaswamy V, Lewandowski L, et al. Psychometric assessment of the Arabic version of the Internalized Stigma of Mental Illness (ISMI) measure in a refugee population. *Transcultural Psychiatry*. 2015;52(5):636-58.
22. Janssen KJ, Donders ART, Harrell Jr FE, et al. Missing covariate data in medical research: to impute is better than to ignore. *Journal of clinical epidemiology*. 2010;63(7):721-7.
23. Crenshaw K. Mapping the margins: Intersectionality, identity politics, and violence against women of color. *Stan L Rev*. 1990;43:1241.
24. Hatzenbuehler ML. How does sexual minority stigma “get under the skin”? A psychological mediation framework. *Psychological bulletin*. 2009;135(5):707.
25. Abramson LY, Seligman ME, Teasdale JD. Learned helplessness in humans: critique and reformulation. *Journal of abnormal psychology*. 1978;87(1):49.
26. Mineka S, Zinbarg R. A contemporary learning theory perspective on the etiology of anxiety disorders: it's not what you thought it was. *American psychologist*. 2006;61(1):10.
27. Kaplan RL, El Khoury C, Wehbe S, et al. Pilot Results from the First HIV/AIDS Intervention Among Transgender Women in the Middle East: Gender Affirmation and Social Support from Within Trans Communities in Beirut, Lebanon. *AIDS Research and Human Retroviruses*. 2020;36(6):501-12.
28. Logie CH, Lacombe-Duncan A, Lee-Foon N, et al. “It’s for us–newcomers, LGBTQ persons, and HIV-positive persons. You feel free to be”: a qualitative study exploring social support group participation among African and Caribbean lesbian, gay, bisexual and transgender newcomers and refugees in Toronto, Canada. *BMC international health and human rights* 2016; 16(1):1-10.
29. Pachankis JE, McConocha EM, Clark KA, et al. A Transdiagnostic Minority Stress Intervention for Sexual Minority Women’s Depression, Anxiety, and Unhealthy Alcohol Use: A Randomized Controlled Trial. *Journal of consulting and clinical psychology* 2020; 88(7):613–630.

Supplemental Table 1. Partial results from logistic regression models regressing mental health on socio-demographic characteristics and displacement status among Lebanese and displaced Syrian MSM and transgender women in Lebanon,  $N = 488$ 

| Variable                 | Clinical Depression <sup>a</sup> |            |                          |            | Severe Anxiety <sup>b</sup> |            |                          |            | Post-Traumatic Stress Disorder <sup>c</sup><br>( $N = 468$ ) |            |                          |            |
|--------------------------|----------------------------------|------------|--------------------------|------------|-----------------------------|------------|--------------------------|------------|--------------------------------------------------------------|------------|--------------------------|------------|
|                          | Unadjusted (Bivariate)           |            | Adjusted (Multivariable) |            | Unadjusted (Bivariate)      |            | Adjusted (Multivariable) |            | Unadjusted (Bivariate)                                       |            | Adjusted (Multivariable) |            |
|                          | OR                               | 95% CI     | aOR                      | 95% CI     | OR                          | 95% CI     | aOR                      | 95% CI     | OR                                                           | 95% CI     | aOR                      | 95% CI     |
| Displacement status      |                                  |            |                          |            |                             |            |                          |            |                                                              |            |                          |            |
| Lebanese (not displaced) | <i>ref</i>                       | <i>ref</i> | <i>ref</i>               | <i>ref</i> | <i>ref</i>                  | <i>ref</i> | <i>ref</i>               | <i>ref</i> | <i>ref</i>                                                   | <i>ref</i> | <i>ref</i>               | <i>ref</i> |
| Displaced Syrian         | <b>2.19***</b>                   | 1.52; 3.15 | <b>1.23†</b>             | 1.00 1.52  | <b>1.78*</b>                | 1.10; 2.88 | 1.14                     | 0.87; 1.50 | <b>2.18***</b>                                               | 1.42; 3.34 | <b>1.23†</b>             | 0.97; 1.57 |

Notation and bolding used to denote significance: †  $p < 0.10$ ; \*  $p < 0.05$ ; \*\*  $p < 0.01$ ; \*\*\*  $p < 0.001$   
 Multivariable models adjusted for: age, household size, gender identity, education, income and relationship status.  
 OR = odds ratio; aOR = adjusted odds ratio; 95% CI = 95% confidence interval  
<sup>a</sup> Depression measured by the Center for Epidemiological Studies Depression (CES-D). Clinical depression cutoff denoted by a score of 16 or greater on the CES-D.  
<sup>b</sup> Anxiety assessed by the Beck Anxiety Inventory (BAI). Severe anxiety cutoff denoted by a score of 26 or greater on the BAI.  
<sup>c</sup> Posttraumatic Stress measured by the PTSD Check List – Civilian Version (PCL-C). Posttraumatic stress disorder cutoff denoted by a score of 50 or greater on the PCL-C.

Supplemental Table 2. Partial results from logistic regression models regressing mental health on displacement-related stressors and stigma-related stressors among displaced Syrian MSM and transgender women in Lebanon,  $N = 230$

| Variable                                                                                                                                                                                                                                                                                                                                                                                                                                                                                                                                                                                                                                                                                                                                                                                                                                  | Clinical Depression <sup>a</sup> |               |                             |               | Severe Anxiety <sup>b</sup> |               |                             |               | Post-Traumatic Stress Disorder <sup>c</sup><br>( $N = 224$ ) |               |                             |               |
|-------------------------------------------------------------------------------------------------------------------------------------------------------------------------------------------------------------------------------------------------------------------------------------------------------------------------------------------------------------------------------------------------------------------------------------------------------------------------------------------------------------------------------------------------------------------------------------------------------------------------------------------------------------------------------------------------------------------------------------------------------------------------------------------------------------------------------------------|----------------------------------|---------------|-----------------------------|---------------|-----------------------------|---------------|-----------------------------|---------------|--------------------------------------------------------------|---------------|-----------------------------|---------------|
|                                                                                                                                                                                                                                                                                                                                                                                                                                                                                                                                                                                                                                                                                                                                                                                                                                           | Unadjusted<br>(Bivariate)        |               | Adjusted<br>(Multivariable) |               | Unadjusted<br>(Bivariate)   |               | Adjusted<br>(Multivariable) |               | Unadjusted<br>(Bivariate)                                    |               | Adjusted<br>(Multivariable) |               |
|                                                                                                                                                                                                                                                                                                                                                                                                                                                                                                                                                                                                                                                                                                                                                                                                                                           | OR                               | 95%<br>CI     | aOR                         | 95%<br>CI     | OR                          | 95%<br>CI     | aOR                         | 95%<br>CI     | OR                                                           | 95%<br>CI     | aOR                         | 95%<br>CI     |
| <b>Displacement-related stressors</b>                                                                                                                                                                                                                                                                                                                                                                                                                                                                                                                                                                                                                                                                                                                                                                                                     |                                  |               |                             |               |                             |               |                             |               |                                                              |               |                             |               |
| Number of locations lived since moving to Lebanon                                                                                                                                                                                                                                                                                                                                                                                                                                                                                                                                                                                                                                                                                                                                                                                         | <b>1.12*</b>                     | 1.00;<br>1.26 | 1.00                        | 0.91;<br>1.11 | <b>1.10**</b>               | 1.02;<br>1.19 | 1.05                        | 0.97;<br>1.12 | <b>1.20**</b>                                                | 1.07;<br>1.35 | <b>1.11†</b>                | 0.99;<br>1.25 |
| Legal status in Lebanon (e.g., official visa or permit)                                                                                                                                                                                                                                                                                                                                                                                                                                                                                                                                                                                                                                                                                                                                                                                   |                                  |               |                             |               |                             |               |                             |               |                                                              |               |                             |               |
| Does not have legal status                                                                                                                                                                                                                                                                                                                                                                                                                                                                                                                                                                                                                                                                                                                                                                                                                | <i>ref</i>                       | <i>ref</i>    | <i>ref</i>                  | <i>Ref</i>    | <i>ref</i>                  | <i>ref</i>    | <i>ref</i>                  | <i>Ref</i>    | <i>ref</i>                                                   | <i>ref</i>    | <i>ref</i>                  | <i>Ref</i>    |
| Has legal status                                                                                                                                                                                                                                                                                                                                                                                                                                                                                                                                                                                                                                                                                                                                                                                                                          | <b>0.33***</b>                   | 0.19;<br>0.59 | 0.76                        | 0.53;<br>1.10 | <b>0.25***</b>              | 0.11;<br>0.57 | <b>0.65†</b>                | 0.40;<br>1.05 | <b>0.24***</b>                                               | 1.20;<br>0.47 | 0.72                        | 0.48;<br>1.09 |
| <b>Stigma-related stressors</b>                                                                                                                                                                                                                                                                                                                                                                                                                                                                                                                                                                                                                                                                                                                                                                                                           |                                  |               |                             |               |                             |               |                             |               |                                                              |               |                             |               |
| Sexual minority discrimination                                                                                                                                                                                                                                                                                                                                                                                                                                                                                                                                                                                                                                                                                                                                                                                                            | <b>2.66***</b>                   | 1.77;<br>4.00 | <b>1.96*</b>                | 1.17;<br>3.27 | <b>2.11***</b>              | 1.60;<br>2.78 | <b>1.56*</b>                | 1.08;<br>2.25 | <b>1.71***</b>                                               | 1.32;<br>2.21 | 1.05                        | 0.73;<br>1.52 |
| Sexual minority assault                                                                                                                                                                                                                                                                                                                                                                                                                                                                                                                                                                                                                                                                                                                                                                                                                   | <b>2.51***</b>                   | 1.82;<br>3.47 | 1.36                        | 0.91;<br>2.05 | <b>1.76***</b>              | 1.31;<br>2.36 | 1.25                        | 0.84;<br>1.85 | <b>2.01***</b>                                               | 1.53;<br>2.65 | 1.37                        | 0.93;<br>2.01 |
| Internalized sexual minority stigma                                                                                                                                                                                                                                                                                                                                                                                                                                                                                                                                                                                                                                                                                                                                                                                                       | <b>1.06**</b>                    | 1.02;<br>1.11 | <b>1.10*</b>                | 1.02;<br>1.18 | 0.98                        | 0.93;<br>1.03 | 1.03                        | 0.96;<br>1.11 | <b>1.07**</b>                                                | 1.02;<br>1.11 | 1.05                        | 0.99;<br>1.12 |
| Internalized Syrian stigma                                                                                                                                                                                                                                                                                                                                                                                                                                                                                                                                                                                                                                                                                                                                                                                                                | <b>1.13***</b>                   | 1.08;<br>1.19 | 1.03                        | 0.95;<br>1.11 | 1.03                        | 0.99;<br>1.08 | 0.98                        | 0.91;<br>1.06 | <b>1.10***</b>                                               | 1.05;<br>1.14 | 1.04                        | 0.96;<br>1.12 |
| Notation and bolding used to denote significance: † $p < 0.10$ ; * $p < 0.05$ ; ** $p < 0.01$ ; *** $p < 0.001$<br>Multivariable models adjusted for: age, household size, gender identity, education, income and relationship status.<br>OR = odds ratio; aOR = adjusted odds ratio; 95% CI = 95% confidence interval<br><sup>a</sup> Depression measured by the Center for Epidemiological Studies Depression (CES-D). Clinical depression cutoff denoted by a score of 16 or greater on the CES-D.<br><sup>b</sup> Anxiety assessed by the Beck Anxiety Inventory (BAI). Severe anxiety cutoff denoted by a score of 26 or greater on the BAI.<br><sup>c</sup> Posttraumatic Stress measured by the PTSD Check List – Civilian Version (PCL-C). Posttraumatic stress disorder cutoff denoted by a score of 50 or greater on the PCL-C. |                                  |               |                             |               |                             |               |                             |               |                                                              |               |                             |               |

## STROBE (Strengthening The Reporting of OBServational Studies in Epidemiology) Checklist

A checklist of items that should be included in reports of observational studies. You must report the page number in your manuscript where you consider each of the items listed in this checklist. If you have not included this information, either revise your manuscript accordingly before submitting or note N/A.

**Note:** An Explanation and Elaboration article discusses each checklist item and gives methodological background and published examples of transparent reporting. The STROBE checklist is best used in conjunction with this article (freely available on the Web sites of PLoS Medicine at <http://www.plosmedicine.org/>, Annals of Internal Medicine at <http://www.annals.org/>, and Epidemiology at <http://www.epidem.com/>). Information on the STROBE Initiative is available at [www.strobe-statement.org](http://www.strobe-statement.org).

| Section and Item     | Item No. | Recommendation                                                                                                                                                                                                                                                                                                                                                                                                                                                                 | Reported on Page No. |
|----------------------|----------|--------------------------------------------------------------------------------------------------------------------------------------------------------------------------------------------------------------------------------------------------------------------------------------------------------------------------------------------------------------------------------------------------------------------------------------------------------------------------------|----------------------|
| Title and Abstract   | 1        | (a) Indicate the study's design with a commonly used term in the title or the abstract                                                                                                                                                                                                                                                                                                                                                                                         |                      |
|                      |          | (b) Provide in the abstract an informative and balanced summary of what was done and what was found                                                                                                                                                                                                                                                                                                                                                                            |                      |
| <b>Introduction</b>  |          |                                                                                                                                                                                                                                                                                                                                                                                                                                                                                |                      |
| Background/Rationale | 2        | Explain the scientific background and rationale for the investigation being reported                                                                                                                                                                                                                                                                                                                                                                                           |                      |
| Objectives           | 3        | State specific objectives, including any prespecified hypotheses                                                                                                                                                                                                                                                                                                                                                                                                               |                      |
| <b>Methods</b>       |          |                                                                                                                                                                                                                                                                                                                                                                                                                                                                                |                      |
| Study Design         | 4        | Present key elements of study design early in the paper                                                                                                                                                                                                                                                                                                                                                                                                                        |                      |
| Setting              | 5        | Describe the setting, locations, and relevant dates, including periods of recruitment, exposure, follow-up, and data collection                                                                                                                                                                                                                                                                                                                                                |                      |
| Participants         | 6        | (a) <i>Cohort study</i> —Give the eligibility criteria, and the sources and methods of selection of participants. Describe methods of follow-up<br><br><i>Case-control study</i> —Give the eligibility criteria, and the sources and methods of case ascertainment and control selection. Give the rationale for the choice of cases and controls<br><br><i>Cross-sectional study</i> —Give the eligibility criteria, and the sources and methods of selection of participants |                      |
|                      |          | (b) <i>Cohort study</i> —For matched studies, give matching criteria and number of exposed and unexposed<br><br><i>Case-control study</i> —For matched studies, give matching criteria and the number of controls per case                                                                                                                                                                                                                                                     |                      |
| Variables            | 7        | Clearly define all outcomes, exposures, predictors, potential confounders, and effect modifiers. Give diagnostic criteria, if applicable                                                                                                                                                                                                                                                                                                                                       |                      |

| Section and Item             | Item No. | Recommendation                                                                                                                                                                                                                                                                                                    | Reported on Page No. |
|------------------------------|----------|-------------------------------------------------------------------------------------------------------------------------------------------------------------------------------------------------------------------------------------------------------------------------------------------------------------------|----------------------|
| Data Sources/<br>Measurement | 8*       | For each variable of interest, give sources of data and details of methods of assessment (measurement). Describe comparability of assessment methods if there is more than one group                                                                                                                              |                      |
| Bias                         | 9        | Describe any efforts to address potential sources of bias                                                                                                                                                                                                                                                         |                      |
| Study Size                   | 10       | Explain how the study size was arrived at                                                                                                                                                                                                                                                                         |                      |
| Quantitative Variables       | 11       | Explain how quantitative variables were handled in the analyses. If applicable, describe which groupings were chosen and why                                                                                                                                                                                      |                      |
| Statistical Methods          | 12       | (a) Describe all statistical methods, including those used to control for confounding                                                                                                                                                                                                                             |                      |
|                              |          | (b) Describe any methods used to examine subgroups and interactions                                                                                                                                                                                                                                               |                      |
|                              |          | (c) Explain how missing data were addressed                                                                                                                                                                                                                                                                       |                      |
|                              |          | (d) <i>Cohort study</i> —If applicable, explain how loss to follow-up was addressed<br><br><i>Case-control study</i> —If applicable, explain how matching of cases and controls was addressed<br><br><i>Cross-sectional study</i> —If applicable, describe analytical methods taking account of sampling strategy |                      |
|                              |          | (e) Describe any sensitivity analyses                                                                                                                                                                                                                                                                             |                      |
| <b>Results</b>               |          |                                                                                                                                                                                                                                                                                                                   |                      |
| Participants                 | 13*      | (a) Report numbers of individuals at each stage of study—eg numbers potentially eligible, examined for eligibility, confirmed eligible, included in the study, completing follow-up, and analysed                                                                                                                 |                      |
|                              |          | (b) Give reasons for non-participation at each stage                                                                                                                                                                                                                                                              |                      |
|                              |          | (c) Consider use of a flow diagram                                                                                                                                                                                                                                                                                |                      |
| Descriptive Data             | 14*      | (a) Give characteristics of study participants (eg demographic, clinical, social) and information on exposures and potential confounders                                                                                                                                                                          |                      |
|                              |          | (b) Indicate number of participants with missing data for each variable of interest                                                                                                                                                                                                                               |                      |
|                              |          | (c) <i>Cohort study</i> —Summarise follow-up time (eg, average and total amount)                                                                                                                                                                                                                                  |                      |
| Outcome Data                 | 15*      | <i>Cohort study</i> —Report numbers of outcome events or summary measures over time                                                                                                                                                                                                                               |                      |
|                              |          | <i>Case-control study</i> —Report numbers in each exposure category, or summary measures of exposure                                                                                                                                                                                                              |                      |
|                              |          | <i>Cross-sectional study</i> —Report numbers of outcome events or summary measures                                                                                                                                                                                                                                |                      |

| Section and Item         | Item No. | Recommendation                                                                                                                                                                                               | Reported on Page No. |
|--------------------------|----------|--------------------------------------------------------------------------------------------------------------------------------------------------------------------------------------------------------------|----------------------|
| Main Results             | 16       | (a) Give unadjusted estimates and, if applicable, confounder-adjusted estimates and their precision (eg, 95% confidence interval). Make clear which confounders were adjusted for and why they were included |                      |
|                          |          | (b) Report category boundaries when continuous variables were categorized                                                                                                                                    |                      |
|                          |          | (c) If relevant, consider translating estimates of relative risk into absolute risk for a meaningful time period                                                                                             |                      |
| Other Analyses           | 17       | Report other analyses done—eg analyses of subgroups and interactions, and sensitivity analyses                                                                                                               |                      |
| <b>Discussion</b>        |          |                                                                                                                                                                                                              |                      |
| Key Results              | 18       | Summarise key results with reference to study objectives                                                                                                                                                     |                      |
| Limitations              | 19       | Discuss limitations of the study, taking into account sources of potential bias or imprecision. Discuss both direction and magnitude of any potential bias                                                   |                      |
| Interpretation           | 20       | Give a cautious overall interpretation of results considering objectives, limitations, multiplicity of analyses, results from similar studies, and other relevant evidence                                   |                      |
| Generalisability         | 21       | Discuss the generalisability (external validity) of the study results                                                                                                                                        |                      |
| <b>Other Information</b> |          |                                                                                                                                                                                                              |                      |
| Funding                  | 22       | Give the source of funding and the role of the funders for the present study and, if applicable, for the original study on which the present article is based                                                |                      |

\*Give information separately for cases and controls in case-control studies and, if applicable, for exposed and unexposed groups in cohort and cross-sectional studies.

**Once you have completed this checklist, please save a copy and upload it as part of your submission. DO NOT include this checklist as part of the main manuscript document. It must be uploaded as a separate file.**



# BMJ Open

## Stigma, displacement stressors, and psychiatric morbidity among displaced Syrian men who have sex with men (MSM) and transgender women: A cross-sectional study in Lebanon

|                                 |                                                                                                                                                                                                                                                                                                                                                                                                                                                                                                                                                                                                                                                                                   |
|---------------------------------|-----------------------------------------------------------------------------------------------------------------------------------------------------------------------------------------------------------------------------------------------------------------------------------------------------------------------------------------------------------------------------------------------------------------------------------------------------------------------------------------------------------------------------------------------------------------------------------------------------------------------------------------------------------------------------------|
| Journal:                        | <i>BMJ Open</i>                                                                                                                                                                                                                                                                                                                                                                                                                                                                                                                                                                                                                                                                   |
| Manuscript ID                   | bmjopen-2020-046996.R1                                                                                                                                                                                                                                                                                                                                                                                                                                                                                                                                                                                                                                                            |
| Article Type:                   | Original research                                                                                                                                                                                                                                                                                                                                                                                                                                                                                                                                                                                                                                                                 |
| Date Submitted by the Author:   | 12-Apr-2021                                                                                                                                                                                                                                                                                                                                                                                                                                                                                                                                                                                                                                                                       |
| Complete List of Authors:       | Clark, Kirsty; Yale University School of Public Health, Pachankis, John ; Yale School of Public Health Khoshnood, Kaveh; Yale University School of Public Health Branstrom, R.; Yale University Yale School of Public Health, Department of Chronic Disease Epidemiology; Karolinska Institutet Department of Clinical Neuroscience, Department of clinical neuroscience Seal, David; Tulane University School of Public Health and Tropical Medicine, Global Community Health and Behavioral Sciences Khoury, Danielle; American University of Beirut Fouad, F Barbour, Russell; Yale University School of Public Health Heimer, Robert; Yale University School of Public Health |
| <b>Primary Subject Heading</b>: | Public health                                                                                                                                                                                                                                                                                                                                                                                                                                                                                                                                                                                                                                                                     |
| Secondary Subject Heading:      | Mental health, Epidemiology, Global health                                                                                                                                                                                                                                                                                                                                                                                                                                                                                                                                                                                                                                        |
| Keywords:                       | MENTAL HEALTH, PUBLIC HEALTH, EPIDEMIOLOGY                                                                                                                                                                                                                                                                                                                                                                                                                                                                                                                                                                                                                                        |
|                                 |                                                                                                                                                                                                                                                                                                                                                                                                                                                                                                                                                                                                                                                                                   |

SCHOLARONE™  
Manuscripts



I, the Submitting Author has the right to grant and does grant on behalf of all authors of the Work (as defined in the below author licence), an exclusive licence and/or a non-exclusive licence for contributions from authors who are: i) UK Crown employees; ii) where BMJ has agreed a CC-BY licence shall apply, and/or iii) in accordance with the terms applicable for US Federal Government officers or employees acting as part of their official duties; on a worldwide, perpetual, irrevocable, royalty-free basis to BMJ Publishing Group Ltd ("BMJ") its licensees and where the relevant Journal is co-owned by BMJ to the co-owners of the Journal, to publish the Work in this journal and any other BMJ products and to exploit all rights, as set out in our [licence](#).

The Submitting Author accepts and understands that any supply made under these terms is made by BMJ to the Submitting Author unless you are acting as an employee on behalf of your employer or a postgraduate student of an affiliated institution which is paying any applicable article publishing charge ("APC") for Open Access articles. Where the Submitting Author wishes to make the Work available on an Open Access basis (and intends to pay the relevant APC), the terms of reuse of such Open Access shall be governed by a Creative Commons licence – details of these licences and which [Creative Commons](#) licence will apply to this Work are set out in our licence referred to above.

Other than as permitted in any relevant BMJ Author's Self Archiving Policies, I confirm this Work has not been accepted for publication elsewhere, is not being considered for publication elsewhere and does not duplicate material already published. I confirm all authors consent to publication of this Work and authorise the granting of this licence.

1  
2  
3  
4  
5  
6  
7  
8  
9 Stigma, displacement stressors, and psychiatric morbidity among displaced Syrian men who  
10 have sex with men (MSM) and transgender women: A cross-sectional study in Lebanon  
11  
12  
13  
14  
15  
16

17 Kirsty A. Clark, PhD<sup>1</sup>, John E. Pachankis, PhD<sup>1</sup>, Kaveh Khoshnood, PhD<sup>1</sup>, Richard Bränström,  
18 PhD<sup>2</sup>, David W. Seal, PhD<sup>3</sup>, Danielle Khoury, MPH<sup>4</sup>, Fouad M. Fouad, MD<sup>4</sup>, Russell Barbour,  
19 PhD<sup>1</sup>, Robert Heimer, PhD<sup>1</sup>  
20  
21  
22  
23  
24  
25  
26  
27  
28  
29  
30

31 <sup>1</sup>Yale School of Public Health, 60 College St, New Haven, CT, 06510, USA

32 <sup>2</sup>Karolinska Institutet, Solnavägen 1, 171 77 Solna, Sweden

33  
34 <sup>3</sup>Tulane University School of Public Health & Tropical Medicine, 1440 Canal St, New Orleans,  
35 LA, 70112, USA  
36

37 <sup>4</sup>American University of Beirut, Bliss Street, Beirut, Lebanon  
38  
39  
40  
41  
42

43 Corresponding Author:  
44 Kirsty Clark, PhD, MPH  
45 Department of Social and Behavioral Sciences  
46 Yale School of Public Health  
47 60 College St. New Haven, CT, 06510  
48 Email: [kirsty.clark@yale.edu](mailto:kirsty.clark@yale.edu)  
49 Phone: 646-344-4060  
50  
51  
52  
53  
54  
55  
56  
57  
58  
59  
60

## ABSTRACT

**Background.** Displaced Syrians face psychiatric morbidity often resultant from displacement-related stressors (e.g., resource scarcity). Both men who have sex with men (MSM) and transgender women among the displaced Syrians are particularly vulnerable to mental health challenges given that they also often face stigma-related stressors (e.g., discrimination).

**Methods.** Between January and December 2019 in greater Beirut, 258 Lebanese-born and 230 displaced Syrian MSM and transgender women were recruited via respondent-driven sampling to complete an in-person survey assessing displacement-related stressors, stigma-related stressors, and depression, anxiety, and posttraumatic stress disorder. In the total sample, we first documented the prevalence of psychiatric morbidity; among the displaced Syrians, we then assessed associations among displacement-related and stigma-related stressors and each psychiatric outcome.

**Results.** Sixty-three percent of Syrian participants met criteria for depression compared to 43.8% of Lebanese participants ( $p < 0.001$ ); 21.3% of Syrians met criteria for severe anxiety compared to 13.1% of Lebanese participants ( $p < 0.05$ ); and 33.0% of Syrians met criteria for posttraumatic stress disorder compared to 18.4% of Lebanese participants ( $p < 0.001$ ). Among Syrian MSM and transgender women, socio-demographic characteristics, displacement-related stressors, and stigma-related stressors were uniquely associated with psychiatric morbidity.

**Conclusion.** Displaced Syrian MSM and transgender women experience higher levels of psychiatric co-morbidities than Lebanese MSM and transgender women in part due to compounding exposure to displacement-related stressors and stigma-related stressors. Informed by tenets of minority stress theory and intersectionality theory, we discuss mental health intervention implications and future directions.

### Strengths and limitations of this study

- This is the first study assessing psychiatric morbidity among Syrian men who have sex with men (MSM) and transgender women displaced by armed conflict in Lebanon.
- Respondent-driven sampling recruited both Lebanese and displaced Syrians, allowing for comparison of prevalence and determinants of psychiatric morbidity between groups.
- Valid and reliable instruments were used to assess stigma experiences, displacement stressors, and psychiatric morbidity.
- The study's cross-sectional design precludes causal inference of determinants of psychiatric morbidity.
- This study assessed discrimination and assault events related to sexual minority status; it did not assess discrimination and assaults events related to gender identity or Syrian nationality.

peer review only

## INTRODUCTION

Since March 2011, over half of Syria's population has been displaced to escape the ongoing armed conflict, with many taking refuge in neighboring Lebanon. The United Nations High Commissioner for Refugees (UNHCR) has deemed the Syrian refugee crisis the largest humanitarian emergency in modern history. One and half million fled to Lebanon, which prior to the influx of Syrian refugees had a population of no greater than 4.5 million and which now hosts the largest proportion of refugees per capita in the world[1].

Displaced Syrians living in Lebanon face significant psychosocial challenges associated with depression, anxiety, and posttraumatic stress disorder. Recently, two studies documented that the prevalence of depression and posttraumatic stress disorder among samples of displaced Syrians in Lebanon exceeded 27% and 43%, respectively[2-3]. Psychiatric morbidity emerges from a confluence of risk factors including pre-existing mental disorders; conflict-related trauma, violence, loss, and displacement; and maladjustment to a new environment due to poor living conditions, scarcity of resources, and intergroup conflict with host communities[4-5].

Both men who have sex with men (MSM) and transgender women among the displaced Syrians are particularly vulnerable to the mental health challenges of stigma given their dual minority status both as a MSM or transgender woman and displaced person[6]. In addition to fleeing their homes to escape war and political instability, Syrian MSM and transgender women also flee to escape identity-related persecution and violence[7]. Once in Lebanon, however, they often face anti-gay and anti-transgender stigma driven by a conservative legal climate and social attitudes. The Lebanese penal code has been used to criminalize same-sex sexual behavior through Article 534 which condemns "sexual intercourse against nature" and gender expression and identity

1  
2  
3 through Article 521 which prohibits men from “masquerading” as women. In 2018, a district  
4 appeals court in Lebanon ruled that consensual sex between people of the same sex is not  
5 unlawful; Article 534, however, has not been repealed. MSM and transgender women in  
6 Lebanon report negative psychosocial outcomes (e.g., concealment, shame) in response to anti-  
7 gay and anti-transgender discrimination and harassment[8-9]. One recent study found that Syrian  
8 MSM in Lebanon experienced more than twice the prevalence of discriminatory or violent  
9 events than Lebanese MSM, perhaps owing to the intersection of their MSM status and Syrian  
10 nationality[6].  
11  
12  
13  
14  
15  
16  
17  
18  
19  
20  
21

22 Minority stress theory posits that discrimination based on sexual or gender identity can lead to  
23 internalized stigmatizing beliefs and associated psychological distress[10]. Due in large part to  
24 these experiences, sexual and gender minorities around the world experience elevated rates of  
25 psychiatric morbidity compared to their heterosexual, cisgender peers[11-12]. Yet to our  
26 knowledge, only two studies have assessed the prevalence of depression among Lebanese MSM  
27 (26%)[13] and transgender women (66%)[9] and neither examined the prevalence or  
28 determinants of mental health problems among displaced Syrian MSM and transgender women.  
29  
30  
31  
32  
33  
34  
35  
36  
37  
38  
39  
40  
41  
42  
43  
44  
45  
46  
47  
48  
49  
50  
51  
52  
53  
54  
55  
56  
57  
58  
59  
60

The lack of studies including displaced Syrian MSM and transgender women hampers  
understanding of the relative importance of displacement-related determinants (e.g.,  
displacement stressors, resource scarcity, displacement-related discrimination) versus MSM and  
transgender-related determinants (e.g., experienced and internalized stigma) on psychiatric  
morbidity in this population. Assessing such determinants can inform tailored mental health  
interventions deemed critical by UNHCR and other humanitarian organizations for reducing  
psychiatric morbidity and associated distress among this vulnerable subgroup of Syrians[6].

1  
2  
3 Drawing on a large sample of MSM and transgender women recruited by respondent-driven  
4 sampling in Lebanon, the current study sought to: (1) assess and compare the prevalence of  
5 common psychiatric disorders (i.e., depression, anxiety, posttraumatic stress disorder) among  
6  
7  
8  
9  
10  
11  
12  
13  
14  
15  
16  
17  
18  
19  
20  
21  
22  
23  
24  
25  
26  
27  
28  
29  
30  
31  
32  
33  
34  
35  
36  
37  
38  
39  
40  
41  
42  
43  
44  
45  
46  
47  
48  
49  
50  
51  
52  
53  
54  
55  
56  
57  
58  
59  
60

Drawing on a large sample of MSM and transgender women recruited by respondent-driven sampling in Lebanon, the current study sought to: (1) assess and compare the prevalence of common psychiatric disorders (i.e., depression, anxiety, posttraumatic stress disorder) among Lebanese and Syrian MSM and transgender women, and (2) among Syrian MSM and transgender women, examine the relative impact of displacement-specific and MSM and transgender-specific determinants of psychiatric morbidity. This study represents the first investigation of prevalence and determinants of psychiatric morbidity among displaced Syrian MSM and transgender women.

## METHOD

### Participants

Between January and December 2019, MSM and transgender women in the greater Beirut region were recruited to complete a biobehavioral survey of socio-demographics, mental health, stigma experiences, and sexually transmitted infections (STI) focusing on HIV-risk and protective behaviors[6]. The current manuscript does not report STI-related results. Eligible participants had been assigned male sex at birth, reported oral or anal sexual intercourse with a male in the past six months, and provided informed consent. Participants were recruited utilizing respondent-driven sampling[14] by one of five local non-governmental organizations (NGOs) that offer psychosocial health services, HIV/STI counseling and testing, basic needs (e.g., food banks), and legal advocacy for lesbian, gay, bisexual, transgender, and queer (LGBTQ) populations. These five NGOs represent the sites providing the most LGBTQ-related services in Lebanon; the NGOs are secular and based in Beirut, but have partnerships across Lebanon including within refugee camps, allowing for geographically diverse recruitment of MSM and transgender



1  
2  
3 women. Briefly, nine Syrian-born seed participants were recruited directly by study personnel.  
4  
5 Each then received four coupons to recruit additional participants and successful recruits were  
6  
7 then each given four coupons. Participants received \$20 for completing the survey and \$10 for  
8  
9 each subsequently recruited participant. Surveys were conducted in Arabic via in-person  
10  
11 interviews with trained study staff at local NGOs or LGBTQ-friendly venues (e.g., bars).  
12  
13  
14

15 MSM and transgender women were included in the current study if they completed any mental  
16  
17 health assessment (i.e., depression, anxiety, and posttraumatic stress) and were either Lebanese-  
18  
19 born or were Syrian-born and migrated to Lebanon after March 15, 2011 when the Syrian  
20  
21 conflict began. For this reason, we can consider all Syrian participants in the current study to be  
22  
23 displaced Syrians. In total, 594 MSM and transgender women were recruited. We dropped from  
24  
25 analyses 19 Syrian-born individuals who migrated to Lebanon before March 15, 2011, 27  
26  
27 participants who were born outside of Lebanon or Syria (e.g., Iraq, Jordan, Kuwait), and 60  
28  
29 participants who did not complete any mental health assessments. Our final analytic sample size  
30  
31 was 488. This study was approved by the Yale Human Subjects Committee and the Institutional  
32  
33 Review Board at the American University of Beirut.  
34  
35  
36  
37  
38

### 39 **Patient and public involvement statement**

40  
41 Stakeholders from local LGBTQ NGOs in greater Beirut, including service providers and MSM  
42  
43 and transgender community members, were involved in study development including finalizing  
44  
45 study measures and RDS seed participant recruitment.  
46  
47  
48

### 49 **Measures**

50  
51  
52 *Socio-demographics.* We assessed age, household size, gender identity, education level, monthly  
53  
54 income, relationship status, and partner gender.  
55  
56  
57  
58  
59  
60

1  
2  
3 *Discrimination and assault.* Stigma-related measures assessed experiences related to sexual  
4 minority status; experiences specific to gender minority status were not assessed in this study.  
5  
6  
7  
8 Discrimination was measured by five yes-or-no questions assessing whether an individual had  
9  
10 been refused health care, employment, religious services, restaurant or bar service, or housing in  
11  
12 the past 12 months because they were believed to be a sexual minority. Assault was measured by  
13  
14 three yes-or-no questions assessing if an individual had experienced verbal harassment, physical  
15  
16 abuse, or sexual assault in the past 12 months because they were believed to be a sexual  
17  
18 minority. These questions have been reliably used to measure discrimination and assault  
19  
20 exposure among MSM around the world including in Lebanon[6].  
21  
22

23  
24 *Internalized stigma.* Two sets of six items measured internalized stigmatizing beliefs regarding  
25  
26 one's status as a sexual minority or, if applicable, as a Syrian person. Measures were adapted  
27  
28 from a validated instrument of internalized HIV-related stigma[15].  
29  
30

31  
32 *Displacement-related stressors.* Syrian participants reported on two stressors related to  
33  
34 displacement. As a measure of unstable housing, Syrian participants reported how many  
35  
36 locations they had lived in since moving to Lebanon. As a measure of legal status, Syrian  
37  
38 participants reported whether they had an official visa or permit in Lebanon.  
39  
40

41  
42 *Mental health.* Depression was measured by the 20-item self-report Center for Epidemiologic  
43  
44 Studies Depression Scale (CES-D) with a cutoff score of  $\geq 16$  suggesting the presence of  
45  
46 clinically significant depressive symptoms[16]. Anxiety was assessed by the 21-item self-report  
47  
48 Beck Anxiety Inventory (BAI) with a cutoff score of  $\geq 26$  suggesting the presence of severe  
49  
50 anxiety[17]. Posttraumatic stress was measured by the 17-item self-report Posttraumatic Stress  
51  
52 Disorder CheckList for Civilians (PCL-C) with a cutoff score of  $\geq 50$  suggesting probable  
53  
54  
55

1  
2  
3 posttraumatic stress disorder[18]. The CES-D, BAI, and PCL-C have been employed as valid  
4  
5 instruments assessing depression, anxiety severity, and posttraumatic stress disorder,  
6  
7 respectively, in Arabic-speaking community and displaced populations[19-21].  
8  
9

## 10 **Statistical Analysis**

11  
12  
13 Analyses were conducted in SAS version 9.4 and proceeded in three steps. First, descriptive  
14  
15 statistics were used to assess socio-demographic, stigma-related stressors, and mental health  
16  
17 differences between Lebanese-born and Syrian-born MSM and transgender women. Second,  
18  
19 simple linear regression models examined unadjusted associations between socio-demographic  
20  
21 factors, displacement status (Lebanese-born versus displaced Syrian), and each mental health  
22  
23 outcome. Variables that showed significant associations at  $p < 0.05$  in bivariate models were  
24  
25 retained in adjusted multivariable linear regression models. There were generally very little  
26  
27 missing covariate data (see **Table 1** for all individual variable sample sizes); nonetheless,  
28  
29 missing data in regression models were handled via multiple imputation procedures with fully  
30  
31 conditional specification, pooling results from five multiply imputed datasets[22]. Third, we  
32  
33 restricted analyses to displaced Syrians and conducted bivariate and multivariable linear  
34  
35 regression analyses to assess the unadjusted and adjusted associations, respectively, between  
36  
37 socio-demographic characteristics, displacement-related stressors, stigma-related stressors (i.e.,  
38  
39 discrimination, assault, internalized sexual minority and Syrian stigma), and each mental health  
40  
41 outcome. Supplemental logistic regression analyses mirrored the primary analyses but assessed  
42  
43 the presence of psychiatric morbidity utilizing binary indicators of mental health cutoffs as  
44  
45 outcomes. Supplemental logistic regression analyses mirrored the primary analyses but assessed  
46  
47 the presence of psychiatric morbidity utilizing binary indicators of mental health cutoffs as  
48  
49 outcomes.  
50  
51  
52

## 53 **RESULTS**

Bivariate analyses showed that displaced Syrians were younger, had less educational attainment, and had lower monthly income than Lebanese participants (see **Table 1**). Notably, nearly two-thirds of Syrian participants reported a monthly income of \$0-\$500 USD compared to approximately one-third of Lebanese participants. In total, 86.4% of the sample identified as a man, and 13.6% of participants identified as a woman, transgender woman, or other gender identity.

Table 1. Sample characteristics among Lebanese and displaced Syrian MSM and transgender women recruited through respondent driven sampling in Lebanon,  $N = 488$

| Socio-demographic variable                 | Lebanese<br>( $n = 258$ ; 52.3%) |            | Displaced Syrian<br>( $n = 230$ ; 47.1%) |            | Chi-sq or<br>t value |
|--------------------------------------------|----------------------------------|------------|------------------------------------------|------------|----------------------|
|                                            | n or<br>Mean                     | % or<br>SD | n or<br>Mean                             | % or<br>SD |                      |
| Age ( $n = 486$ )                          | 28.0                             | 7.08       | 26.0                                     | 4.60       | 3.85***              |
| Household size ( $n = 482$ )               | 3.98                             | 2.08       | 3.72                                     | 2.13       | 1.35                 |
| Gender Identity ( $n = 420$ )              |                                  |            |                                          |            | 0.74                 |
| Man                                        | 203                              | 85.7       | 160                                      | 87.4       |                      |
| Woman or Transgender Woman                 | 26                               | 11.0       | 19                                       | 10.4       |                      |
| Other                                      | 8                                | 3.4        | 4                                        | 2.2        |                      |
| Education level                            |                                  |            |                                          |            | 28.87***             |
| Did not complete primary school            | 10                               | 3.9        | 11                                       | 4.8        |                      |
| Completed primary school                   | 47                               | 18.2       | 70                                       | 30.4       |                      |
| Completed secondary school                 | 46                               | 17.8       | 43                                       | 18.7       |                      |
| Some college or university                 | 52                               | 20.2       | 63                                       | 27.4       |                      |
| Completed university                       | 103                              | 39.9       | 43                                       | 18.7       |                      |
| Income (monthly, US dollars) ( $n = 480$ ) |                                  |            |                                          |            | 93.48***             |
| \$0-500                                    | 91                               | 35.7       | 147                                      | 65.3       |                      |
| \$501-1000                                 | 66                               | 25.9       | 72                                       | 32.0       |                      |
| \$1001-2000                                | 65                               | 25.5       | 5                                        | 2.2        |                      |
| \$2001-4000                                | 32                               | 12.6       | 1                                        | 0.4        |                      |
| Greater than \$4000                        | 1                                | 0.4        | 0                                        | 0.0        |                      |
| Relationship status ( $n = 486$ )          |                                  |            |                                          |            | 0.91                 |
| Single                                     | 168                              | 65.4       | 159                                      | 69.4       |                      |
| Partnered                                  | 89                               | 34.6       | 70                                       | 30.6       |                      |
| Gender of partner ( $n = 159$ )            |                                  |            |                                          |            | 2.61                 |
| Cisgender man                              | 78                               | 87.6       | 63                                       | 90.0       |                      |
| Cisgender woman                            | 2                                | 2.3        | 1                                        | 1.4        |                      |
| Transgender man                            | 1                                | 1.1        | 0                                        | 0.0        |                      |

|                                            |   |     |   |     |  |
|--------------------------------------------|---|-----|---|-----|--|
| Transgender woman                          | 4 | 4.5 | 5 | 7.1 |  |
| Other (e.g., Gender non-conforming)        | 4 | 4.5 | 1 | 1.4 |  |
| * $p < 0.05$ ** $p < 0.01$ *** $p < 0.001$ |   |     |   |     |  |

Prevalence of psychiatric morbidity in the sample was generally high (see **Table 2**). Sixty-three percent of Syrians met or exceeded the cutoff for depression compared to 43.8% of Lebanese participants ( $p < 0.001$ ). Approximately 21.3% of Syrians met criteria for severe anxiety compared to 13.1% of Lebanese participants ( $p < 0.05$ ). Thirty-three percent of Syrians were considered to have posttraumatic stress disorder compared to 18.4% of Lebanese participants ( $p < 0.001$ ). Syrian participants reported higher stigma-related stress including internalized sexual minority stigma and greater exposure to recent discrimination and assault than Lebanese-born participants.

| Mental health or stigma variable                                      | Lebanese<br>( $n = 258$ ; 52.3%) |            | Displaced Syrian<br>( $n = 230$ ; 47.1%) |            | Chi-sq or<br>t value |
|-----------------------------------------------------------------------|----------------------------------|------------|------------------------------------------|------------|----------------------|
|                                                                       | n or<br>Mean                     | % or<br>SD | n or<br>Mean                             | % or<br>SD |                      |
| Depression <sup>a</sup> (range: 0 - 60)                               | 16.79                            | 14.33      | 23.15                                    | 15.16      | 4.76***              |
| Depression cutoff <sup>a</sup> (n, %)                                 | 113                              | 43.8       | 145                                      | 63.0       | 18.07***             |
| Anxiety <sup>b</sup> (range: 0 - 63)                                  | 11.05                            | 12.32      | 14.89                                    | 13.77      | 3.25**               |
| Severe anxiety cutoff <sup>b</sup> (n, %)                             | 34                               | 13.1       | 49                                       | 21.3       | 5.68*                |
| Posttraumatic Stress <sup>c</sup> ( $n = 468$ ; range: 17 - 84)       | 32.91                            | 16.57      | 41.63                                    | 17.00      | 5.62***              |
| Posttraumatic stress disorder cutoff <sup>c</sup> ( $n = 468$ ; n, %) | 45                               | 18.4       | 74                                       | 33.0       | 13.11***             |
| Internalized sexual minority stigma (range: 6 - 30)                   | 13.27                            | 5.14       | 16.50                                    | 6.37       | 6.12***              |
| Internalized Syrian stigma (range: 6 - 30)                            | --                               | --         | 13.97                                    | 7.23       | --                   |
| Sexual minority discrimination (range: 0 - 5)                         | 0.50                             | 1.04       | 0.77                                     | 1.13       | 2.73**               |
| Sexual minority assault (range: 0 - 3)                                | 0.76                             | 0.88       | 1.16                                     | 1.09       | 4.38***              |

\* $p < 0.05$  \*\* $p < 0.01$  \*\*\*  $p < 0.001$   
<sup>a</sup> Depression measured by the Center for Epidemiological Studies Depression (CES-D). Clinical depression cutoff denoted by a score of 16 or greater on the CES-D.  
<sup>b</sup> Anxiety assessed by the Beck Anxiety Inventory (BAI). Severe anxiety cutoff denoted by a score of 26 or greater on the BAI.  
<sup>c</sup> Posttraumatic Stress measured by the PTSD Check List – Civilian Version (PCL-C). Posttraumatic stress disorder cutoff denoted by a score of 50 or greater on the PCL-C.

1  
2  
3 Syrian MSM and transgender women experienced higher levels of depression and posttraumatic  
4 stress than Lebanese-born MSM and transgender women in crude and adjusted models (see  
5  
6 **Table 3**). The association between displacement status and anxiety did not reach significance  
7  
8 after adjusting for socio-demographics. In supplemental analyses, Syrians demonstrated a trend  
9  
10 of 1.23 greater odds of both depression and post-traumatic stress disorder than Lebanese-born  
11  
12 participants in adjusted models (see **Supplemental Table 1**). Across models, transgender-  
13  
14 identified participants demonstrated greater psychiatric morbidity than cisgender participants.  
15  
16  
17  
18  
19  
20  
21  
22  
23  
24  
25  
26  
27  
28  
29  
30  
31  
32  
33  
34  
35  
36  
37  
38  
39  
40  
41  
42  
43  
44  
45  
46  
47  
48  
49  
50  
51  
52  
53  
54  
55  
56  
57  
58  
59  
60

Table 3. Linear regression models regressing mental health on socio-demographic characteristics and displacement status among Lebanese and displaced Syrian MSM and transgender women in Lebanon,  $N = 488$ 

| Variable                               | Depression (CES-D)     |            |                          |            | Anxiety (BAI)          |            |                          |            | Post-Traumatic Stress (PCL-C) ( $N = 468$ ) |            |                          |            |
|----------------------------------------|------------------------|------------|--------------------------|------------|------------------------|------------|--------------------------|------------|---------------------------------------------|------------|--------------------------|------------|
|                                        | Unadjusted (Bivariate) |            | Adjusted (Multivariable) |            | Unadjusted (Bivariate) |            | Adjusted (Multivariable) |            | Unadjusted (Bivariate)                      |            | Adjusted (Multivariable) |            |
|                                        | <i>Est.</i>            | <i>SE</i>  | <i>Est.</i>              | <i>SE</i>  | <i>Est.</i>            | <i>SE</i>  | <i>Est.</i>              | <i>SE</i>  | <i>Est.</i>                                 | <i>SE</i>  | <i>Est.</i>              | <i>SE</i>  |
| Age                                    | -0.22                  | 0.11       | -0.03                    | 0.10       | -0.04                  | 0.10       | --                       | --         | -0.26                                       | 0.13       | -0.03                    | 0.12       |
| Household Size                         | <b>-1.14***</b>        | 0.32       | <b>-0.89**</b>           | 0.29       | <b>-0.55†</b>          | 0.28       | -0.33                    | 0.26       | <b>-1.68***</b>                             | 0.37       | <b>-1.50***</b>          | 0.38       |
| Gender Identity                        |                        |            |                          |            |                        |            |                          |            |                                             |            |                          |            |
| Cisgender                              | <i>ref</i>             | <i>ref</i> | <i>ref</i>               | <i>ref</i> | <i>ref</i>             | <i>ref</i> | <i>ref</i>               | <i>ref</i> | <i>ref</i>                                  | <i>ref</i> | <i>ref</i>               | <i>ref</i> |
| Transgender or other (e.g., nonbinary) | <b>11.58***</b>        | 2.01       | <b>6.14***</b>           | 1.87       | <b>10.60***</b>        | 1.73       | <b>6.69***</b>           | 1.67       | <b>11.52***</b>                             | 2.34       | <b>11.92***</b>          | 2.57       |
| Education level                        |                        |            |                          |            |                        |            |                          |            |                                             |            |                          |            |
| Completed primary school or less       | <i>ref</i>             | <i>ref</i> | <i>ref</i>               | <i>ref</i> | <i>ref</i>             | <i>ref</i> | <i>ref</i>               | <i>ref</i> | <i>ref</i>                                  | <i>ref</i> | <i>ref</i>               | <i>ref</i> |
| Completed more than primary school     | <b>-10.26***</b>       | 1.44       | <b>-6.38***</b>          | 1.37       | <b>-6.86***</b>        | 1.28       | <b>-3.49**</b>           | 1.23       | <b>-11.06***</b>                            | 1.65       | <b>-11.60***</b>         | 1.69       |
| Income (monthly)                       |                        |            |                          |            |                        |            |                          |            |                                             |            |                          |            |
| \$0-500                                | <i>ref</i>             | <i>ref</i> | <i>ref</i>               | <i>ref</i> | <i>ref</i>             | <i>ref</i> | <i>ref</i>               | <i>ref</i> | <i>ref</i>                                  | <i>ref</i> | <i>ref</i>               | <i>ref</i> |
| \$501 or more                          | <b>-11.77***</b>       | 1.25       | <b>-8.01***</b>          | 1.32       | <b>-10.00***</b>       | 1.10       | <b>-7.58***</b>          | 1.18       | <b>-13.52***</b>                            | 1.46       | <b>-13.47***</b>         | 1.49       |
| Relationship status                    |                        |            |                          |            |                        |            |                          |            |                                             |            |                          |            |
| Single                                 | <i>ref</i>             | <i>ref</i> | <i>ref</i>               | <i>ref</i> | <i>ref</i>             | <i>ref</i> | <i>ref</i>               | <i>ref</i> | <i>ref</i>                                  | <i>ref</i> | <i>ref</i>               | <i>ref</i> |
| Partnered                              | <b>-4.70**</b>         | 1.44       | <b>-5.48***</b>          | 1.28       | <b>-4.45***</b>        | 1.26       | <b>-4.84***</b>          | 1.15       | <b>-4.75**</b>                              | 1.66       | <b>-4.95**</b>           | 1.69       |
| Displacement status                    |                        |            |                          |            |                        |            |                          |            |                                             |            |                          |            |
| Lebanese (not displaced)               | <i>ref</i>             | <i>ref</i> | <i>ref</i>               | <i>ref</i> | <i>ref</i>             | <i>ref</i> | <i>ref</i>               | <i>ref</i> | <i>ref</i>                                  | <i>ref</i> | <i>ref</i>               | <i>ref</i> |
| Displaced Syrian                       | <b>6.36***</b>         | 1.33       | <b>2.75*</b>             | 1.26       | <b>3.84**</b>          | 1.18       | 1.00                     | 1.13       | <b>8.35***</b>                              | 1.52       | <b>8.73***</b>           | 1.55       |

Notation and bolding used to denote significance: †  $p < 0.10$ ; \*  $p < 0.05$ ; \*\*  $p < 0.01$ ; \*\*\*  $p < 0.001$

*Est.* = Estimate; *SE* = standard error

CES-D = Center for Epidemiologic Studies Depression Scale; BAI = Beck Anxiety Inventory; PCL-C = PTSD Check List – Civilian Version

1  
2  
3 Among Syrian MSM and transgender women, socio-demographic characteristics, displacement-  
4 related stressors, and stigma-related stressors all served as determinants of psychiatric morbidity  
5 as assessed by multiple linear regression models (see **Table 4**). Regarding socio-demographic  
6 characteristics, lower monthly income and not being in a relationship were significantly  
7 associated with higher levels of depression, anxiety, and posttraumatic stress. In terms of  
8 displacement-related stressors, the greater number of locations lived since migrating to Lebanon  
9 was associated with higher anxiety ( $\beta=.50$ ;  $p < 0.01$ ) and posttraumatic stress ( $\beta=.52$ ;  $p < 0.01$ ).  
10 Participants who did not have legal status reported higher depression ( $\beta=3.63$ ,  $p < 0.05$ ), anxiety  
11 ( $\beta=4.14$ ,  $p < 0.05$ ), and posttraumatic stress ( $\beta=5.81$ ,  $p < 0.01$ ) than those with legal status.  
12 Exposure to past-year sexual minority discrimination ( $\beta=2.16$ ,  $p < 0.05$ ) and assault ( $\beta=2.23$ ,  $p <$   
13  $0.05$ ) were each associated with higher depression, while internalized sexual minority stigma was  
14 marginally associated ( $\beta=0.33$ ,  $p < 0.10$ ) and internalized Syrian stigma was not associated with  
15 depression. Exposure to sexual minority discrimination ( $\beta=2.29$ ,  $p < 0.01$ ) and internalized  
16 Syrian stigma ( $\beta=0.24$ ,  $p < 0.05$ ) were associated with more severe anxiety. The only stigma-  
17 related stressor significantly associated with posttraumatic stress was sexual minority assault  
18 ( $\beta=2.31$ ,  $p < 0.05$ ). Supplemental logistic regression analyses demonstrated similar, but  
19 somewhat attenuated, results to linear regression analyses perhaps due to limited power (see  
20 **Supplemental Table 2**).  
21  
22  
23  
24  
25  
26  
27  
28  
29  
30  
31  
32  
33  
34  
35  
36  
37  
38  
39  
40  
41  
42  
43  
44  
45  
46  
47  
48  
49  
50  
51  
52  
53  
54  
55  
56  
57  
58  
59  
60



Table 4. Linear regression models regressing mental health on socio-demographic characteristics, displacement-related stressors, and stigma-related stressors among displaced Syrian MSM and transgender women in Lebanon, N = 230

| Variable                                                | Depression (CES-D)     |            |                          |            | Anxiety (BAI)          |            |                          |            | Post-Traumatic Stress (PCL-C) (N = 224) |            |                          |            |
|---------------------------------------------------------|------------------------|------------|--------------------------|------------|------------------------|------------|--------------------------|------------|-----------------------------------------|------------|--------------------------|------------|
|                                                         | Unadjusted (Bivariate) |            | Adjusted (Multivariable) |            | Unadjusted (Bivariate) |            | Adjusted (Multivariable) |            | Unadjusted (Bivariate)                  |            | Adjusted (Multivariable) |            |
|                                                         | Est.                   | SE         | Est.                     | SE         | Est.                   | SE         | Est.                     | SE         | Est.                                    | SE         | Est.                     | SE         |
| <b>Socio-demographic characteristics</b>                |                        |            |                          |            |                        |            |                          |            |                                         |            |                          |            |
| Age                                                     | -0.33                  | 0.22       | --                       | --         | -0.13                  | 0.20       | --                       | --         | <b>-0.51*</b>                           | 0.24       | 0.12                     | 0.22       |
| Household Size                                          | -0.17                  | 0.47       | --                       | --         | -0.04                  | 0.44       | --                       | --         | -0.51                                   | 0.55       | --                       | --         |
| Gender Identity                                         |                        |            |                          |            |                        |            |                          |            |                                         |            |                          |            |
| Cisgender                                               | <i>ref</i>             | <i>ref</i> | <i>ref</i>               | <i>ref</i> | <i>ref</i>             | <i>ref</i> | <i>ref</i>               | <i>ref</i> | <i>ref</i>                              | <i>ref</i> | <i>ref</i>               | <i>ref</i> |
| Transgender or other (e.g., nonbinary)                  | <b>6.86*</b>           | 3.23       | 0.70                     | 3.21       | <b>10.25***</b>        | 2.69       | 2.89                     | 2.67       | <b>9.01*</b>                            | 3.50       | 1.92                     | 3.36       |
| Education level                                         |                        |            |                          |            |                        |            |                          |            |                                         |            |                          |            |
| Completed primary school or less                        | <i>ref</i>             | <i>ref</i> | <i>ref</i>               | <i>ref</i> | <i>ref</i>             | <i>ref</i> | <i>ref</i>               | <i>ref</i> | <i>ref</i>                              | <i>ref</i> | <i>ref</i>               | <i>ref</i> |
| Completed more than primary school                      | <b>-6.93***</b>        | 2.04       | -2.95                    | 1.98       | <b>-4.49*</b>          | 1.87       | -2.35                    | 1.69       | <b>-7.30**</b>                          | 2.31       | -3.22                    | 2.21       |
| Income (monthly)                                        |                        |            |                          |            |                        |            |                          |            |                                         |            |                          |            |
| \$0-500                                                 | <i>ref</i>             | <i>ref</i> | <i>ref</i>               | <i>ref</i> | <i>ref</i>             | <i>ref</i> | <i>ref</i>               | <i>ref</i> | <i>ref</i>                              | <i>ref</i> | <i>ref</i>               | <i>ref</i> |
| \$501 or more                                           | <b>-7.89***</b>        | 2.04       | <b>-6.02**</b>           | 1.89       | <b>-7.71***</b>        | 1.83       | <b>-5.36**</b>           | 1.74       | <b>-9.14***</b>                         | 2.35       | <b>-7.40***</b>          | 2.19       |
| Relationship status                                     |                        |            |                          |            |                        |            |                          |            |                                         |            |                          |            |
| Single                                                  | <i>ref</i>             | <i>ref</i> | <i>ref</i>               | <i>ref</i> | <i>ref</i>             | <i>ref</i> | <i>ref</i>               | <i>ref</i> | <i>ref</i>                              | <i>ref</i> | <i>ref</i>               | <i>ref</i> |
| Partnered                                               | <b>-5.00*</b>          | 2.14       | <b>-3.58†</b>            | 1.88       | <b>-3.29†</b>          | 1.97       | <b>-3.73*</b>            | 1.75       | <b>-6.11*</b>                           | 2.43       | <b>-5.42*</b>            | 2.13       |
| <b>Displacement-related stressors</b>                   |                        |            |                          |            |                        |            |                          |            |                                         |            |                          |            |
| Number of locations lived since moving to Lebanon       | <b>0.74***</b>         | 0.17       | <b>0.37†</b>             | 0.17       | <b>0.86***</b>         | 0.16       | <b>0.50**</b>            | 0.15       | <b>0.91***</b>                          | 0.77       | <b>0.52**</b>            | 0.19       |
| Legal status in Lebanon (e.g., official visa or permit) |                        |            |                          |            |                        |            |                          |            |                                         |            |                          |            |
| Does not have legal status                              | <i>ref</i>             | <i>ref</i> | <i>ref</i>               | <i>ref</i> | <i>ref</i>             | <i>ref</i> | <i>ref</i>               | <i>ref</i> | <i>ref</i>                              | <i>ref</i> | <i>ref</i>               | <i>ref</i> |
| Has legal status                                        | <b>-9.04***</b>        | 1.97       | <b>-3.63*</b>            | 1.87       | <b>-8.70***</b>        | 1.78       | <b>-4.14*</b>            | 1.71       | <b>-11.36***</b>                        | 2.21       | <b>-5.81**</b>           | 2.12       |
| <b>Stigma-related stressors</b>                         |                        |            |                          |            |                        |            |                          |            |                                         |            |                          |            |
| Sexual minority discrimination                          | <b>5.05***</b>         | 0.82       | <b>2.16*</b>             | 0.92       | <b>5.04***</b>         | 0.73       | <b>2.29**</b>            | 0.83       | <b>5.47***</b>                          | 0.95       | 1.62                     | 1.05       |
| Sexual minority assault                                 | <b>5.76***</b>         | 0.83       | <b>2.23*</b>             | 0.94       | <b>4.40***</b>         | 0.78       | 0.57                     | 0.86       | <b>6.43***</b>                          | 0.94       | <b>2.31*</b>             | 1.09       |
| Internalized sexual minority stigma                     | <b>0.51**</b>          | 0.15       | <b>0.33†</b>             | 0.18       | 0.19                   | 0.14       | --                       | --         | <b>0.54**</b>                           | 0.17       | 0.30                     | 0.21       |
| Internalized Syrian stigma                              | <b>0.70***</b>         | 0.13       | 0.20                     | 0.16       | <b>0.49***</b>         | 0.12       | <b>0.24*</b>             | 0.12       | <b>0.78***</b>                          | 0.15       | 0.26                     | 0.18       |

|                                                                                                                                                                                                                                                                                                                                                                       |
|-----------------------------------------------------------------------------------------------------------------------------------------------------------------------------------------------------------------------------------------------------------------------------------------------------------------------------------------------------------------------|
| <p>Notation and bolding used to denote significance: † <math>p &lt; 0.10</math>; * <math>p &lt; 0.05</math>; ** <math>p &lt; 0.01</math>; *** <math>p &lt; 0.001</math><br/> <i>Est.</i> = Estimate; SE = standard error<br/> CES-D = Center for Epidemiologic Studies Depression Scale; BAI = Beck Anxiety Inventory; PCL-C = PTSD Check List – Civilian Version</p> |
|-----------------------------------------------------------------------------------------------------------------------------------------------------------------------------------------------------------------------------------------------------------------------------------------------------------------------------------------------------------------------|

1  
2  
3  
4  
5  
6  
7  
8  
9  
10  
11  
12  
13  
14  
15  
16  
17  
18  
19  
20  
21  
22  
23  
24  
25  
26  
27  
28  
29  
30  
31  
32  
33  
34  
35  
36  
37  
38  
39  
40  
41  
42  
43  
44  
45  
46  
47

For peer review only

## DISCUSSION

To our knowledge, this study represents the first study to document the prevalence and determinants of psychiatric morbidity among displaced Syrian MSM and transgender women.

Our data, accrued by respondent-driven sampling in 2019, showed substantially elevated prevalence of depression, anxiety, and posttraumatic stress disorder among displaced Syrian MSM and transgender women compared to Lebanese MSM and transgender women.

Findings from the current study are consistent with prior research showing that depression, anxiety, and posttraumatic stress disorder are elevated among both MSM and transgender women and individuals displaced by armed conflict[2-4,10-12]. In support of minority stress theory[10] and intersectionality theory,[23] displaced Syrian MSM and transgender women in the sample experienced a confluence of stigma-related and displacement-related stressors in response to their interlocking minority statuses as both a sexual or gender minority and displaced person. Exposure to such stressors can influence psychiatric morbidity through underlying cognitive processes[24]. For example, the learned helplessness theory of depression posits that individuals who experience an aversive, uncontrollable event can become helpless due to feeling a lack of control over their circumstances[25]. Those who attribute the cause of such an aversive, uncontrollable event to internal (i.e., due to the person themselves), global (i.e., affecting the person's whole life), and stable (i.e., unchangeable) factors are most likely to become depressed[25]. Stigma-related stress events – including discrimination on the basis of minority or displacement status – can be viewed as uncontrollable and global[24]. When an individual believes themselves the cause of stigma-related stress events, they are more likely to develop depression. Among displaced Syrian MSM and transgender women in the current study, sexual

1  
2  
3 minority-related discrimination and assault and internalized sexual minority stigma were  
4  
5 associated with greater depression while internalized Syrian stigma was not associated with  
6  
7 greater depression. Displaced Syrian MSM and transgender women might view their sexual or  
8  
9 gender identity status as having an internal cause (i.e., being innate) versus their displaced Syrian  
10  
11 status as having an external cause (i.e., war); MSM and transgender-related stigma might  
12  
13 therefore be more strongly associated with depression than displacement-related stigma.  
14  
15

16  
17 Research on the etiology of anxiety disorders suggests that accounting for contextual influences  
18  
19 is critical for understanding how aversive events (e.g., stigma-related discrimination and  
20  
21 violence) can lead to anxiety or posttraumatic stress disorder[26]. Modern learning theorists  
22  
23 suggest that differences in individual factors affect the strength of fear that is conditioned by  
24  
25 aversive events[26]. Such individual-level differences include previous exposure to traumatic or  
26  
27 aversive events, the context of the aversive event (e.g., whether the event is controllable or  
28  
29 uncontrollable), and post-event experiences (e.g., an inflation effect such that the strength of  
30  
31 milder fears can be inflated by subsequent traumatic events). On average, almost two-thirds of  
32  
33 displaced Syrians in the current study reported experiencing at least one form of verbal  
34  
35 harassment, physical abuse, or sexual assault due to their sexual minority status in the past 12  
36  
37 months. We theorize that such stigma-related stress events are especially likely to lead to anxiety  
38  
39 and posttraumatic stress disorder due to the perception of stigma-related stressors as pervasive  
40  
41 and uncontrollable. Further, the mental health toll of such stigma-related events might be inflated  
42  
43 by displaced Syrian MSM and transgender women's likely exposure to previous traumatic or  
44  
45 aversive events due to their intersecting statuses[7,24]. In support of this theory, displaced Syrian  
46  
47 MSM and transgender women demonstrated substantially higher risk of posttraumatic stress  
48  
49 disorder than Lebanese MSM and transgender women.  
50  
51  
52  
53  
54  
55

1  
2  
3 The high prevalence of psychiatric co-morbidities in this study delineates the need for mental  
4 health support for displaced Syrian MSM and transgender women. UNHCR and other  
5 humanitarian programs have emphasized that mental health interventions for vulnerable  
6 subgroups of displaced Syrians are critical to reducing psychiatric morbidity and associated  
7 distress, yet very few exist[4]. A recent Cochrane review of mental health promotion, prevention,  
8 and treatment for displaced people including refugees and asylum seekers found that existing  
9 interventions focus primarily on PTSD and trauma-related symptoms rather than anxiety,  
10 depression or co-morbid mental health problems; few assess cultural appropriateness or  
11 acceptability of mental health interventions for displaced populations[27]. For displaced Syrian  
12 MSM and transgender women, mental health interventions should be attuned to the unique  
13 intersections of sexual and/or gender minority and displacement status that include coping with  
14 stigma and trauma while increasing personal coping in the face of unchangeable stressors (e.g.,  
15 stigmatizing societal attitudes) and uncertainty (e.g., regarding legal status). Promising  
16 qualitative results were recently published from a pilot study assessing the first mental  
17 health/HIV intervention for transgender women in the Middle East. Named Baynetna and  
18 conducted in Lebanon, it includes six modules conducted in a weekly, peer-led, group-based  
19 format covering topics including transphobia, violence, family rejection, self-esteem as well as  
20 psychoeducational content related to sexual risk[28]. In a sample of 16 transgender women  
21 (including three displaced individuals), preliminary results showed that Baynetna was feasible,  
22 acceptable, and promising trends emerged in increasing social support and reducing mental  
23 health symptoms. While only a randomized-controlled trial can confirm the efficacy of  
24 Baynetna, results from the pilot study suggest that mental health interventions targeting MSM  
25 and transgender women in Lebanon might benefit from engaging members through a support

1  
2  
3 group-based format. Recent qualitative evidence from a social support group for LGBTQ  
4  
5 refugees in Canada further bolsters the promise of such group-based formats for delivering  
6  
7 mental health intervention content in a supportive space to normalize stigmatizing experiences,  
8  
9 share coping skills and material resources (e.g., employment opportunities), build social support  
10  
11 and community connectedness, and buffer feelings of isolation and loneliness associated with  
12  
13 poor mental health[29]. Mental health interventions for displaced Syrian MSM and transgender  
14  
15 women might incorporate tenets of cognitive-behavioral treatment from minority-stress-mental-  
16  
17 health treatments that have recently demonstrated efficacy in reducing depression and anxiety  
18  
19 symptoms among gender-diverse populations of sexual minorities in the US[30] including in a  
20  
21 group-based format with racial/ethnic minority MSM that was adapted based on the framework  
22  
23 of intersectionality theory (Skyler Jackson, et al., 2020, unpublished manuscript).  
24  
25  
26  
27  
28

29 While several aspects of the current study represent notable strengths, including a large sample  
30  
31 recruited by respondent-driven sampling and validated measures assessing psychiatric morbidity,  
32  
33 the current study is limited in its cross-sectional design that precludes causal inference of  
34  
35 determinants of psychiatric morbidity. Studies employing a prospective design are warranted to  
36  
37 identify longitudinal predictors and uncover mediators of poorer mental health among displaced  
38  
39 Syrian MSM and transgender women. Additionally, the study was designed for MSM, and, while  
40  
41 the relatively large proportion of transgender women we recruited represents a relative strength,  
42  
43 the study measures did not assess stigma-related stressors specific to gender identity. Future  
44  
45 studies should incorporate measures assessing experiences related to identifying as a transgender  
46  
47 woman versus MSM. Last, measures assessing external stigma-related experiences (i.e.,  
48  
49 discrimination and assault) asked about events related to sexual minority status and did not  
50  
51 assess discrimination or assault related to Syrian nationality. Assessing the relative impact of  
52  
53  
54  
55  
56

1  
2  
3 discrimination or assault based on MSM and transgender status versus Syrian nationality can  
4  
5 further clarify the influence of stigma attribution on psychiatric morbidity in this population.  
6  
7

8 In support of minority stress theory and aligned with intersectionality theory, displaced Syrian  
9  
10 MSM and transgender women experience higher levels of depression, anxiety, and posttraumatic  
11  
12 stress disorder than Lebanese MSM and transgender women in part due to identity-related  
13  
14 stigmatization and displacement-related stressors. Mental health interventions are needed among  
15  
16 displaced Syrian MSM and transgender women and might incorporate tenets of cognitive-  
17  
18 behavioral science and modern learning theory including stigma-coping and personal mastery  
19  
20 content. Such content should focus on building resilience and tackle underlying cognitive  
21  
22 processes among those who have faced recurrent, uncontrollable, adverse events (e.g., identity-  
23  
24 related assault and rejection, conflict-related trauma and displacement) based on their dual-  
25  
26 minority status as an MSM or transgender women and a displaced person. Mental health  
27  
28 interventions for displaced Syrian MSM and transgender women delivered in a support group  
29  
30 format may be well-poised to offer a supportive, community-based environment while also  
31  
32 representing a cost-effective modality.  
33  
34  
35  
36  
37  
38  
39  
40  
41  
42  
43  
44  
45  
46  
47  
48  
49  
50  
51  
52  
53  
54  
55  
56  
57  
58  
59  
60

## ACKNOWLEDGEMENTS

This project was funded by the National Institute of Child and Human Development (R21HD089820).

## DATA SHARING

Data is available by emailing Robert Heimer at Robert.Heimer@yale.edu or corresponding at Robert Heimer, Yale School of Public Health, 60 College St., PO Box 208034, New Haven, CT, USA 06520-8034

## AUTHOR CONTRIBUTION STATEMENT

KAC, JEP, RBränström, and RH conceptualised the manuscript. KK, FMF, DWS, and RH supervised the study. DK collected data. KAC and RBarbour ran the analyses. KAC prepared the first draft of the Article and revised it based on feedback from JEP, RBränström, KK, DK, DWS, and RH. All authors reviewed and approved the Article.

## COMPETING INTERESTS

None declared.



## REFERENCES

1. UNHCR The UN Refugee Agency. Lebanon: Fact Sheet 2020 [Available from: <https://reporting.unhcr.org/sites/default/files/UNHCR%20Lebanon%20Fact%20Sheet%20-%20January%202020.pdf>].
2. Kazour F, Zahreddine NR, Maragel MG, et al. Post-traumatic stress disorder in a sample of Syrian refugees in Lebanon. *Comprehensive Psychiatry*. 2017;72:41-7.
3. Naja WJ, Aoun MP, El Khoury EL, et al. Prevalence of depression in Syrian refugees and the influence of religiosity. *Comprehensive psychiatry*. 2016;68:78-85.
4. Abou-Saleh MT, Hughes P. Mental health of Syrian refugees: looking backwards and forwards. *The Lancet Psychiatry*. 2015;2(10):870-1.
5. Yassin N, Osseiran T, Rassi R, et al. No place to stay? Reflections on the Syrian refugee shelter policy in Lebanon. Beirut, Lebanon: United Nations Human Settlements Programme and the American University of Beirut, 2015.
6. Orr L, Shebl FM, Heimer R, et al. Violence and discrimination against men who have sex with men in Lebanon: the role of international displacement and migration. *Journal of interpersonal violence* 2019:0886260519884684.
7. Alessi EJ, Kahn S, Woolner L, et al. Traumatic stress among sexual and gender minority refugees from the Middle East, North Africa, and Asia who fled to the European Union. *Journal of traumatic stress*. 2018;31(6):805-15.
8. Wagner GJ, Aunon FM, Kaplan RL, et al. Sexual stigma, psychological well-being and social engagement among men who have sex with men in Beirut, Lebanon. *Culture, health & sexuality*. 2013;15(5):570-82.
9. Kaplan RL, Nehme S, Aunon F, et al. Suicide risk factors among trans feminine individuals in Lebanon. *International journal of transgenderism*. 2016;17(1):23-30..
10. Meyer IH. Prejudice, social stress, and mental health in lesbian, gay, and bisexual populations: conceptual issues and research evidence. *Psychological bulletin* 2003;129(5):674.
11. Batchelder AW, Safren S, Mitchell AD, et al. Mental health in 2020 for men who have sex with men in the United States. *Sexual health*. 2017;14(1):59-71.
12. Reisner SL, Poteat T, Keatley J, et al. Global health burden and needs of transgender populations: a review. *The Lancet*. 2016;388(10042):412-36.
13. Wagner GJ, Ghosh-Dastidar B, El Khoury C, et al. Major depression among young men who have sex with men in Beirut, and its association with structural and sexual minority-related stressors, and social support. *Sexuality research and social policy*. 2019;16(4):513-20.
14. Heckathorn DD. Respondent-driven sampling: a new approach to the study of hidden populations. *Social problems*. 1997;44(2):174-99.
15. Kalichman SC, Simbayi LC, Cloete A, et al. Measuring AIDS stigmas in people living with HIV/AIDS: the Internalized AIDS-Related Stigma Scale. *AIDS care*. 2009;21(1):87-93.
16. Radloff LS. The CES-D scale: A self-report depression scale for research in the general population. *Applied psychological measurement*. 1977;1(3):385-401.

17. Ulusoy M, Sahin NH, Erkmen H. The Beck anxiety inventory: psychometric properties. *J Cogn Psychother*. 1998;12(2):163-72.
18. Ruggiero KJ, Del Ben K, Scotti JR, et al. Psychometric properties of the PTSD Checklist—Civilian version. *Journal of traumatic stress*. 2003;16(5):495-502.
19. Thapa SB, Hauff E. Psychological distress among displaced persons during an armed conflict in Nepal. *Social psychiatry and psychiatric epidemiology*. 2005;40(8):672-9.
20. Kazarian SS, Taher D. Validation of the Arabic Center for Epidemiological Studies Depression (CES-D) scale in a Lebanese community sample. *European Journal of Psychological Assessment* 2010;26(1):68-73.
21. Kira IA, Ramaswamy V, Lewandowski L, et al. Psychometric assessment of the Arabic version of the Internalized Stigma of Mental Illness (ISMI) measure in a refugee population. *Transcultural Psychiatry*. 2015;52(5):636-58.
22. Janssen KJ, Donders ART, Harrell Jr FE, et al. Missing covariate data in medical research: to impute is better than to ignore. *Journal of clinical epidemiology*. 2010;63(7):721-7.
23. Crenshaw K. Mapping the margins: Intersectionality, identity politics, and violence against women of color. *Stan L Rev*. 1990;43:1241.
24. Hatzenbuehler ML. How does sexual minority stigma “get under the skin”? A psychological mediation framework. *Psychological bulletin*. 2009;135(5):707.
25. Abramson LY, Seligman ME, Teasdale JD. Learned helplessness in humans: critique and reformulation. *Journal of abnormal psychology*. 1978;87(1):49.
26. Mineka S, Zinbarg R. A contemporary learning theory perspective on the etiology of anxiety disorders: it's not what you thought it was. *American psychologist*. 2006;61(1):10.
27. Uphoff E, Robertson L, Cabieses B, Villalón FJ, Purgato M, Churchill R, Barbu C. An overview of systematic reviews on mental health promotion, prevention, and treatment of common mental disorders for refugees, asylum seekers, and internally displaced persons. *Cochrane Database of Systematic Reviews*. 2020(9).
28. Kaplan RL, El Khoury C, Wehbe S, et al. Pilot Results from the First HIV/AIDS Intervention Among Transgender Women in the Middle East: Gender Affirmation and Social Support from Within Trans Communities in Beirut, Lebanon. *AIDS Research and Human Retroviruses*. 2020;36(6):501-12.
29. Logie CH, Lacombe-Duncan A, Lee-Foon N, et al. “It’s for us—newcomers, LGBTQ persons, and HIV-positive persons. You feel free to be”: a qualitative study exploring social support group participation among African and Caribbean lesbian, gay, bisexual and transgender newcomers and refugees in Toronto, Canada. *BMC international health and human rights* 2016; 16(1):1-10.
30. Pachankis JE, McConocha EM, Clark KA, et al. A Transdiagnostic Minority Stress Intervention for Sexual Minority Women’s Depression, Anxiety, and Unhealthy Alcohol Use: A Randomized Controlled Trial. *Journal of consulting and clinical psychology* 2020; 88(7):613–630.

Supplemental Table 1. Partial results from logistic regression models regressing mental health on socio-demographic characteristics and displacement status among Lebanese and displaced Syrian MSM and transgender women in Lebanon,  $N = 488$ 

| Variable                 | Clinical Depression <sup>a</sup> |            |                          |            | Severe Anxiety <sup>b</sup> |            |                          |            | Post-Traumatic Stress Disorder <sup>c</sup><br>( $N = 468$ ) |            |                          |            |
|--------------------------|----------------------------------|------------|--------------------------|------------|-----------------------------|------------|--------------------------|------------|--------------------------------------------------------------|------------|--------------------------|------------|
|                          | Unadjusted (Bivariate)           |            | Adjusted (Multivariable) |            | Unadjusted (Bivariate)      |            | Adjusted (Multivariable) |            | Unadjusted (Bivariate)                                       |            | Adjusted (Multivariable) |            |
|                          | OR                               | 95% CI     | aOR                      | 95% CI     | OR                          | 95% CI     | aOR                      | 95% CI     | OR                                                           | 95% CI     | aOR                      | 95% CI     |
| Displacement status      |                                  |            |                          |            |                             |            |                          |            |                                                              |            |                          |            |
| Lebanese (not displaced) | <i>ref</i>                       | <i>ref</i> | <i>ref</i>               | <i>ref</i> | <i>ref</i>                  | <i>ref</i> | <i>ref</i>               | <i>ref</i> | <i>ref</i>                                                   | <i>ref</i> | <i>ref</i>               | <i>ref</i> |
| Displaced Syrian         | <b>2.19***</b>                   | 1.52; 3.15 | <b>1.23†</b>             | 1.00 1.52  | <b>1.78*</b>                | 1.10; 2.88 | 1.14                     | 0.87; 1.50 | <b>2.18***</b>                                               | 1.42; 3.34 | <b>1.23†</b>             | 0.97; 1.57 |

Notation and bolding used to denote significance: †  $p < 0.10$ ; \*  $p < 0.05$ ; \*\*  $p < 0.01$ ; \*\*\*  $p < 0.001$   
 Multivariable models adjusted for: age, household size, gender identity, education, income and relationship status.  
 OR = odds ratio; aOR = adjusted odds ratio; 95% CI = 95% confidence interval  
<sup>a</sup> Depression measured by the Center for Epidemiological Studies Depression (CES-D). Clinical depression cutoff denoted by a score of 16 or greater on the CES-D.  
<sup>b</sup> Anxiety assessed by the Beck Anxiety Inventory (BAI). Severe anxiety cutoff denoted by a score of 26 or greater on the BAI.  
<sup>c</sup> Posttraumatic Stress measured by the PTSD Check List – Civilian Version (PCL-C). Posttraumatic stress disorder cutoff denoted by a score of 50 or greater on the PCL-C.

Supplemental Table 2. Partial results from logistic regression models regressing mental health on displacement-related stressors and stigma-related stressors among displaced Syrian MSM and transgender women in Lebanon,  $N = 230$ 

| Variable                                                | Clinical Depression <sup>a</sup> |               |                             |               | Severe Anxiety <sup>b</sup> |               |                             |               | Post-Traumatic Stress Disorder <sup>c</sup><br>( $N = 224$ ) |               |                             |               |
|---------------------------------------------------------|----------------------------------|---------------|-----------------------------|---------------|-----------------------------|---------------|-----------------------------|---------------|--------------------------------------------------------------|---------------|-----------------------------|---------------|
|                                                         | Unadjusted<br>(Bivariate)        |               | Adjusted<br>(Multivariable) |               | Unadjusted<br>(Bivariate)   |               | Adjusted<br>(Multivariable) |               | Unadjusted<br>(Bivariate)                                    |               | Adjusted<br>(Multivariable) |               |
|                                                         | OR                               | 95%<br>CI     | aOR                         | 95%<br>CI     | OR                          | 95%<br>CI     | aOR                         | 95%<br>CI     | OR                                                           | 95%<br>CI     | aOR                         | 95%<br>CI     |
| <b>Displacement-related stressors</b>                   |                                  |               |                             |               |                             |               |                             |               |                                                              |               |                             |               |
| Number of locations lived since moving to Lebanon       | <b>1.12*</b>                     | 1.00;<br>1.26 | 1.00                        | 0.91;<br>1.11 | <b>1.10**</b>               | 1.02;<br>1.19 | 1.05                        | 0.97;<br>1.12 | <b>1.20**</b>                                                | 1.07;<br>1.35 | <b>1.11†</b>                | 0.99;<br>1.25 |
| Legal status in Lebanon (e.g., official visa or permit) |                                  |               |                             |               |                             |               |                             |               |                                                              |               |                             |               |
| Does not have legal status                              | <i>ref</i>                       | <i>ref</i>    | <i>ref</i>                  | <i>Ref</i>    | <i>ref</i>                  | <i>ref</i>    | <i>ref</i>                  | <i>Ref</i>    | <i>ref</i>                                                   | <i>ref</i>    | <i>ref</i>                  | <i>Ref</i>    |
| Has legal status                                        | <b>0.33***</b>                   | 0.19;<br>0.59 | 0.76                        | 0.53;<br>1.10 | <b>0.25***</b>              | 0.11;<br>0.57 | <b>0.65†</b>                | 0.40;<br>1.05 | <b>0.24***</b>                                               | 1.20;<br>0.47 | 0.72                        | 0.48;<br>1.09 |
| <b>Stigma-related stressors</b>                         |                                  |               |                             |               |                             |               |                             |               |                                                              |               |                             |               |
| Sexual minority discrimination                          | <b>2.66***</b>                   | 1.77;<br>4.00 | <b>1.96*</b>                | 1.17;<br>3.27 | <b>2.11***</b>              | 1.60;<br>2.78 | <b>1.56*</b>                | 1.08;<br>2.25 | <b>1.71***</b>                                               | 1.32;<br>2.21 | 1.05                        | 0.73;<br>1.52 |
| Sexual minority assault                                 | <b>2.51***</b>                   | 1.82;<br>3.47 | 1.36                        | 0.91;<br>2.05 | <b>1.76***</b>              | 1.31;<br>2.36 | 1.25                        | 0.84;<br>1.85 | <b>2.01***</b>                                               | 1.53;<br>2.65 | 1.37                        | 0.93;<br>2.01 |
| Internalized sexual minority stigma                     | <b>1.06**</b>                    | 1.02;<br>1.11 | <b>1.10*</b>                | 1.02;<br>1.18 | 0.98                        | 0.93;<br>1.03 | 1.03                        | 0.96;<br>1.11 | <b>1.07**</b>                                                | 1.02;<br>1.11 | 1.05                        | 0.99;<br>1.12 |
| Internalized Syrian stigma                              | <b>1.13***</b>                   | 1.08;<br>1.19 | 1.03                        | 0.95;<br>1.11 | 1.03                        | 0.99;<br>1.08 | 0.98                        | 0.91;<br>1.06 | <b>1.10***</b>                                               | 1.05;<br>1.14 | 1.04                        | 0.96;<br>1.12 |

Notation and bolding used to denote significance: †  $p < 0.10$ ; \*  $p < 0.05$ ; \*\*  $p < 0.01$ ; \*\*\*  $p < 0.001$

Multivariable models adjusted for: age, household size, gender identity, education, income and relationship status.

OR = odds ratio; aOR = adjusted odds ratio; 95% CI = 95% confidence interval

<sup>a</sup> Depression measured by the Center for Epidemiological Studies Depression (CES-D). Clinical depression cutoff denoted by a score of 16 or greater on the CES-D.

<sup>b</sup> Anxiety assessed by the Beck Anxiety Inventory (BAI). Severe anxiety cutoff denoted by a score of 26 or greater on the BAI.

<sup>c</sup> Posttraumatic Stress measured by the PTSD Check List – Civilian Version (PCL-C). Posttraumatic stress disorder cutoff denoted by a score of 50 or greater on the PCL-C.

## STROBE (Strengthening The Reporting of OBservational Studies in Epidemiology) Checklist

A checklist of items that should be included in reports of observational studies. You must report the page number in your manuscript where you consider each of the items listed in this checklist. If you have not included this information, either revise your manuscript accordingly before submitting or note N/A.

**Note:** An Explanation and Elaboration article discusses each checklist item and gives methodological background and published examples of transparent reporting. The STROBE checklist is best used in conjunction with this article (freely available on the Web sites of PLoS Medicine at <http://www.plosmedicine.org/>, Annals of Internal Medicine at <http://www.annals.org/>, and Epidemiology at <http://www.epidem.com/>). Information on the STROBE Initiative is available at [www.strobe-statement.org](http://www.strobe-statement.org).

| Section and Item     | Item No. | Recommendation                                                                                                                                                                                                                                                                                                                                                                                                                                                                 | Reported on Page No. |
|----------------------|----------|--------------------------------------------------------------------------------------------------------------------------------------------------------------------------------------------------------------------------------------------------------------------------------------------------------------------------------------------------------------------------------------------------------------------------------------------------------------------------------|----------------------|
| Title and Abstract   | 1        | (a) Indicate the study's design with a commonly used term in the title or the abstract                                                                                                                                                                                                                                                                                                                                                                                         |                      |
|                      |          | (b) Provide in the abstract an informative and balanced summary of what was done and what was found                                                                                                                                                                                                                                                                                                                                                                            |                      |
| <b>Introduction</b>  |          |                                                                                                                                                                                                                                                                                                                                                                                                                                                                                |                      |
| Background/Rationale | 2        | Explain the scientific background and rationale for the investigation being reported                                                                                                                                                                                                                                                                                                                                                                                           |                      |
| Objectives           | 3        | State specific objectives, including any prespecified hypotheses                                                                                                                                                                                                                                                                                                                                                                                                               |                      |
| <b>Methods</b>       |          |                                                                                                                                                                                                                                                                                                                                                                                                                                                                                |                      |
| Study Design         | 4        | Present key elements of study design early in the paper                                                                                                                                                                                                                                                                                                                                                                                                                        |                      |
| Setting              | 5        | Describe the setting, locations, and relevant dates, including periods of recruitment, exposure, follow-up, and data collection                                                                                                                                                                                                                                                                                                                                                |                      |
| Participants         | 6        | (a) <i>Cohort study</i> —Give the eligibility criteria, and the sources and methods of selection of participants. Describe methods of follow-up<br><br><i>Case-control study</i> —Give the eligibility criteria, and the sources and methods of case ascertainment and control selection. Give the rationale for the choice of cases and controls<br><br><i>Cross-sectional study</i> —Give the eligibility criteria, and the sources and methods of selection of participants |                      |
|                      |          | (b) <i>Cohort study</i> —For matched studies, give matching criteria and number of exposed and unexposed<br><br><i>Case-control study</i> —For matched studies, give matching criteria and the number of controls per case                                                                                                                                                                                                                                                     |                      |
| Variables            | 7        | Clearly define all outcomes, exposures, predictors, potential confounders, and effect modifiers. Give diagnostic criteria, if applicable                                                                                                                                                                                                                                                                                                                                       |                      |

| Section and Item             | Item No. | Recommendation                                                                                                                                                                                                                                                                                            | Reported on Page No. |
|------------------------------|----------|-----------------------------------------------------------------------------------------------------------------------------------------------------------------------------------------------------------------------------------------------------------------------------------------------------------|----------------------|
| Data Sources/<br>Measurement | 8*       | For each variable of interest, give sources of data and details of methods of assessment (measurement). Describe comparability of assessment methods if there is more than one group                                                                                                                      |                      |
| Bias                         | 9        | Describe any efforts to address potential sources of bias                                                                                                                                                                                                                                                 |                      |
| Study Size                   | 10       | Explain how the study size was arrived at                                                                                                                                                                                                                                                                 |                      |
| Quantitative Variables       | 11       | Explain how quantitative variables were handled in the analyses. If applicable, describe which groupings were chosen and why                                                                                                                                                                              |                      |
| Statistical Methods          | 12       | (a) Describe all statistical methods, including those used to control for confounding                                                                                                                                                                                                                     |                      |
|                              |          | (b) Describe any methods used to examine subgroups and interactions                                                                                                                                                                                                                                       |                      |
|                              |          | (c) Explain how missing data were addressed                                                                                                                                                                                                                                                               |                      |
|                              |          | (d) <i>Cohort study</i> —If applicable, explain how loss to follow-up was addressed<br><i>Case-control study</i> —If applicable, explain how matching of cases and controls was addressed<br><i>Cross-sectional study</i> —If applicable, describe analytical methods taking account of sampling strategy |                      |
|                              |          | (e) Describe any sensitivity analyses                                                                                                                                                                                                                                                                     |                      |
| <b>Results</b>               |          |                                                                                                                                                                                                                                                                                                           |                      |
| Participants                 | 13*      | (a) Report numbers of individuals at each stage of study—eg numbers potentially eligible, examined for eligibility, confirmed eligible, included in the study, completing follow-up, and analysed                                                                                                         |                      |
|                              |          | (b) Give reasons for non-participation at each stage                                                                                                                                                                                                                                                      |                      |
|                              |          | (c) Consider use of a flow diagram                                                                                                                                                                                                                                                                        |                      |
| Descriptive Data             | 14*      | (a) Give characteristics of study participants (eg demographic, clinical, social) and information on exposures and potential confounders                                                                                                                                                                  |                      |
|                              |          | (b) Indicate number of participants with missing data for each variable of interest                                                                                                                                                                                                                       |                      |
|                              |          | (c) <i>Cohort study</i> —Summarise follow-up time (eg, average and total amount)                                                                                                                                                                                                                          |                      |
| Outcome Data                 | 15*      | <i>Cohort study</i> —Report numbers of outcome events or summary measures over time                                                                                                                                                                                                                       |                      |
|                              |          | <i>Case-control study</i> —Report numbers in each exposure category, or summary measures of exposure                                                                                                                                                                                                      |                      |
|                              |          | <i>Cross-sectional study</i> —Report numbers of outcome events or summary measures                                                                                                                                                                                                                        |                      |

| Section and Item         | Item No. | Recommendation                                                                                                                                                                                               | Reported on Page No. |
|--------------------------|----------|--------------------------------------------------------------------------------------------------------------------------------------------------------------------------------------------------------------|----------------------|
| Main Results             | 16       | (a) Give unadjusted estimates and, if applicable, confounder-adjusted estimates and their precision (eg, 95% confidence interval). Make clear which confounders were adjusted for and why they were included |                      |
|                          |          | (b) Report category boundaries when continuous variables were categorized                                                                                                                                    |                      |
|                          |          | (c) If relevant, consider translating estimates of relative risk into absolute risk for a meaningful time period                                                                                             |                      |
| Other Analyses           | 17       | Report other analyses done—eg analyses of subgroups and interactions, and sensitivity analyses                                                                                                               |                      |
| <b>Discussion</b>        |          |                                                                                                                                                                                                              |                      |
| Key Results              | 18       | Summarise key results with reference to study objectives                                                                                                                                                     |                      |
| Limitations              | 19       | Discuss limitations of the study, taking into account sources of potential bias or imprecision. Discuss both direction and magnitude of any potential bias                                                   |                      |
| Interpretation           | 20       | Give a cautious overall interpretation of results considering objectives, limitations, multiplicity of analyses, results from similar studies, and other relevant evidence                                   |                      |
| Generalisability         | 21       | Discuss the generalisability (external validity) of the study results                                                                                                                                        |                      |
| <b>Other Information</b> |          |                                                                                                                                                                                                              |                      |
| Funding                  | 22       | Give the source of funding and the role of the funders for the present study and, if applicable, for the original study on which the present article is based                                                |                      |

\*Give information separately for cases and controls in case-control studies and, if applicable, for exposed and unexposed groups in cohort and cross-sectional studies.

**Once you have completed this checklist, please save a copy and upload it as part of your submission. DO NOT include this checklist as part of the main manuscript document. It must be uploaded as a separate file.**
