# Supplementary material for: Stigma, displacement stressors and psychiatric morbidity among displaced Syrian men who have sex with men (MSM) and transgender women: a cross-sectional study in Lebanon
Source: PubMed Central journal article supplement — BMJ Open. 2021 May 13;11(5):e046996. doi: 10.1136/bmjopen-2020-046996 (PMC8126317; doi:10.1136/bmjopen-2020-046996), 2021-05-13
Supplement: bmjopen-2020-046996supp001.pdf [file bmjopen-2020-046996supp001.pdf]

Supplemental Table 1. Partial results from logistic regression models regressing mental health on socio-demographic characteristics and displacement status among Lebanese and displaced Syrian MSM and transgender women in Lebanon,  $N = 488$

| Variable                 | Clinical Depression <sup>a</sup> |            |                          |            | Severe Anxiety <sup>b</sup> |            |                          |            | Post-Traumatic Stress Disorder <sup>c</sup><br>( $N = 468$ ) |            |                          |            |
|--------------------------|----------------------------------|------------|--------------------------|------------|-----------------------------|------------|--------------------------|------------|--------------------------------------------------------------|------------|--------------------------|------------|
|                          | Unadjusted (Bivariate)           |            | Adjusted (Multivariable) |            | Unadjusted (Bivariate)      |            | Adjusted (Multivariable) |            | Unadjusted (Bivariate)                                       |            | Adjusted (Multivariable) |            |
|                          | OR                               | 95% CI     | aOR                      | 95% CI     | OR                          | 95% CI     | aOR                      | 95% CI     | OR                                                           | 95% CI     | aOR                      | 95% CI     |
| Displacement status      |                                  |            |                          |            |                             |            |                          |            |                                                              |            |                          |            |
| Lebanese (not displaced) | <i>ref</i>                       | <i>ref</i> | <i>ref</i>               | <i>ref</i> | <i>ref</i>                  | <i>ref</i> | <i>ref</i>               | <i>ref</i> | <i>ref</i>                                                   | <i>ref</i> | <i>ref</i>               | <i>ref</i> |
| Displaced Syrian         | <b>2.19***</b>                   | 1.52; 3.15 | <b>1.23†</b>             | 1.00; 1.52 | <b>1.78*</b>                | 1.10; 2.88 | 1.14                     | 0.87; 1.50 | <b>2.18***</b>                                               | 1.42; 3.34 | <b>1.23†</b>             | 0.97; 1.57 |

Notation and bolding used to denote significance: †  $p < 0.10$ ; \*  $p < 0.05$ ; \*\*  $p < 0.01$ ; \*\*\*  $p < 0.001$   
 Multivariable models adjusted for: age, household size, gender identity, education, income and relationship status.  
 OR = odds ratio; aOR = adjusted odds ratio; 95% CI = 95% confidence interval  
<sup>a</sup> Depression measured by the Center for Epidemiological Studies Depression (CES-D). Clinical depression cutoff denoted by a score of 16 or greater on the CES-D.  
<sup>b</sup> Anxiety assessed by the Beck Anxiety Inventory (BAI). Severe anxiety cutoff denoted by a score of 26 or greater on the BAI.  
<sup>c</sup> Posttraumatic Stress measured by the PTSD Check List – Civilian Version (PCL-C). Posttraumatic stress disorder cutoff denoted by a score of 50 or greater on the PCL-C.

| Supplemental Table 2. Partial results from logistic regression models regressing mental health on displacement-related stressors and stigma-related stressors among displaced Syrian MSM and transgender women in Lebanon, $N = 230$                                                                                                                                                                                                                                                                                                                                                                                                                                                                                                                                                                                                      |                                  |               |                             |               |                             |               |                             |               |                                                              |               |                             |               |
|-------------------------------------------------------------------------------------------------------------------------------------------------------------------------------------------------------------------------------------------------------------------------------------------------------------------------------------------------------------------------------------------------------------------------------------------------------------------------------------------------------------------------------------------------------------------------------------------------------------------------------------------------------------------------------------------------------------------------------------------------------------------------------------------------------------------------------------------|----------------------------------|---------------|-----------------------------|---------------|-----------------------------|---------------|-----------------------------|---------------|--------------------------------------------------------------|---------------|-----------------------------|---------------|
| Variable                                                                                                                                                                                                                                                                                                                                                                                                                                                                                                                                                                                                                                                                                                                                                                                                                                  | Clinical Depression <sup>a</sup> |               |                             |               | Severe Anxiety <sup>b</sup> |               |                             |               | Post-Traumatic Stress Disorder <sup>c</sup><br>( $N = 224$ ) |               |                             |               |
|                                                                                                                                                                                                                                                                                                                                                                                                                                                                                                                                                                                                                                                                                                                                                                                                                                           | Unadjusted<br>(Bivariate)        |               | Adjusted<br>(Multivariable) |               | Unadjusted<br>(Bivariate)   |               | Adjusted<br>(Multivariable) |               | Unadjusted<br>(Bivariate)                                    |               | Adjusted<br>(Multivariable) |               |
|                                                                                                                                                                                                                                                                                                                                                                                                                                                                                                                                                                                                                                                                                                                                                                                                                                           | OR                               | 95%<br>CI     | aOR                         | 95%<br>CI     | OR                          | 95%<br>CI     | aOR                         | 95%<br>CI     | OR                                                           | 95%<br>CI     | aOR                         | 95%<br>CI     |
| <b>Displacement-related stressors</b>                                                                                                                                                                                                                                                                                                                                                                                                                                                                                                                                                                                                                                                                                                                                                                                                     |                                  |               |                             |               |                             |               |                             |               |                                                              |               |                             |               |
| Number of locations lived since moving to Lebanon                                                                                                                                                                                                                                                                                                                                                                                                                                                                                                                                                                                                                                                                                                                                                                                         | <b>1.12*</b>                     | 1.00;<br>1.26 | 1.00                        | 0.91;<br>1.11 | <b>1.10**</b>               | 1.02;<br>1.19 | 1.05                        | 0.97;<br>1.12 | <b>1.20**</b>                                                | 1.07;<br>1.35 | <b>1.11†</b>                | 0.99;<br>1.25 |
| Legal status in Lebanon (e.g., official visa or permit)                                                                                                                                                                                                                                                                                                                                                                                                                                                                                                                                                                                                                                                                                                                                                                                   |                                  |               |                             |               |                             |               |                             |               |                                                              |               |                             |               |
| Does not have legal status                                                                                                                                                                                                                                                                                                                                                                                                                                                                                                                                                                                                                                                                                                                                                                                                                | <i>ref</i>                       | <i>ref</i>    | <i>ref</i>                  | <i>Ref</i>    | <i>ref</i>                  | <i>ref</i>    | <i>ref</i>                  | <i>Ref</i>    | <i>ref</i>                                                   | <i>ref</i>    | <i>ref</i>                  | <i>Ref</i>    |
| Has legal status                                                                                                                                                                                                                                                                                                                                                                                                                                                                                                                                                                                                                                                                                                                                                                                                                          | <b>0.33***</b>                   | 0.19;<br>0.59 | 0.76                        | 0.53;<br>1.10 | <b>0.25***</b>              | 0.11;<br>0.57 | <b>0.65†</b>                | 0.40;<br>1.05 | <b>0.24***</b>                                               | 1.20;<br>0.47 | 0.72                        | 0.48;<br>1.09 |
| <b>Stigma-related stressors</b>                                                                                                                                                                                                                                                                                                                                                                                                                                                                                                                                                                                                                                                                                                                                                                                                           |                                  |               |                             |               |                             |               |                             |               |                                                              |               |                             |               |
| Sexual minority discrimination                                                                                                                                                                                                                                                                                                                                                                                                                                                                                                                                                                                                                                                                                                                                                                                                            | <b>2.66***</b>                   | 1.77;<br>4.00 | <b>1.96*</b>                | 1.17;<br>3.27 | <b>2.11***</b>              | 1.60;<br>2.78 | <b>1.56*</b>                | 1.08;<br>2.25 | <b>1.71***</b>                                               | 1.32;<br>2.21 | 1.05                        | 0.73;<br>1.52 |
| Sexual minority assault                                                                                                                                                                                                                                                                                                                                                                                                                                                                                                                                                                                                                                                                                                                                                                                                                   | <b>2.51***</b>                   | 1.82;<br>3.47 | 1.36                        | 0.91;<br>2.05 | <b>1.76***</b>              | 1.31;<br>2.36 | 1.25                        | 0.84;<br>1.85 | <b>2.01***</b>                                               | 1.53;<br>2.65 | 1.37                        | 0.93;<br>2.01 |
| Internalized sexual minority stigma                                                                                                                                                                                                                                                                                                                                                                                                                                                                                                                                                                                                                                                                                                                                                                                                       | <b>1.06**</b>                    | 1.02;<br>1.11 | <b>1.10*</b>                | 1.02;<br>1.18 | 0.98                        | 0.93;<br>1.03 | 1.03                        | 0.96;<br>1.11 | <b>1.07**</b>                                                | 1.02;<br>1.11 | 1.05                        | 0.99;<br>1.12 |
| Internalized Syrian stigma                                                                                                                                                                                                                                                                                                                                                                                                                                                                                                                                                                                                                                                                                                                                                                                                                | <b>1.13***</b>                   | 1.08;<br>1.19 | 1.03                        | 0.95;<br>1.11 | 1.03                        | 0.99;<br>1.08 | 0.98                        | 0.91;<br>1.06 | <b>1.10***</b>                                               | 1.05;<br>1.14 | 1.04                        | 0.96;<br>1.12 |
| Notation and bolding used to denote significance: † $p < 0.10$ ; * $p < 0.05$ ; ** $p < 0.01$ ; *** $p < 0.001$<br>Multivariable models adjusted for: age, household size, gender identity, education, income and relationship status.<br>OR = odds ratio; aOR = adjusted odds ratio; 95% CI = 95% confidence interval<br><sup>a</sup> Depression measured by the Center for Epidemiological Studies Depression (CES-D). Clinical depression cutoff denoted by a score of 16 or greater on the CES-D.<br><sup>b</sup> Anxiety assessed by the Beck Anxiety Inventory (BAI). Severe anxiety cutoff denoted by a score of 26 or greater on the BAI.<br><sup>c</sup> Posttraumatic Stress measured by the PTSD Check List – Civilian Version (PCL-C). Posttraumatic stress disorder cutoff denoted by a score of 50 or greater on the PCL-C. |                                  |               |                             |               |                             |               |                             |               |                                                              |               |                             |               |
